# Supplementary material for: Ring-size-selective construction of fluorine-containing carbocycles via intramolecular iodoarylation of 1,1-difluoro-1-alkenes
Source: publisher site journal article supplement (doi:10.3762/bjoc.13.266), 2017-12-14
Supplement: Additional file 1 [file 1860-5397-13-266-S1.pdf]

# **Supporting Information**

## **for**

### **Ring-size-selective construction of fluorine-containing carbocycles via intramolecular iodoarylation of 1,1-difluoro-1-alkenes**

Takeshi Fujita, Ryo Kinoshita, Tsuyoshi Takanohashi, Naoto Suzuki, and Junji Ichikawa\*

Address: Division of Chemistry, Faculty of Pure and Applied Sciences, University of Tsukuba, Tsukuba, Ibaraki 305-8571, Japan

Email: Junji Ichikawa - junji@chem.tsukuba.ac.jp

\*Corresponding author

#### **Detailed experimental procedures and spectral data**

|                                                                            |     |
|----------------------------------------------------------------------------|-----|
| 1. General statement .....                                                 | S2  |
| 2. Preparation of 2-(2-aryl-3,3-difluoroallyl)biaryls <b>1</b> .....       | S3  |
| 3. Preparation of 2-(3,3-difluoroallyl)biaryls <b>5</b> .....              | S7  |
| 4. Iodoarylation of 2-(2-aryl-3,3-difluoroallyl)biaryls <b>1</b> .....     | S9  |
| 5. Synthesis of dihydrophenanthrene bearing a CHF <sub>2</sub> group ..... | S13 |
| 6. Iodoarylation of 2-(3,3-difluoroallyl)biaryls <b>5</b> .....            | S14 |
| 7. Synthesis of difluorodibenzo[a,c][7]annulene .....                      | S16 |
| 8. References .....                                                        | S17 |
| 9. <sup>1</sup> H, <sup>13</sup> C, and <sup>19</sup> F NMR charts .....   | S18 |

## 1. General statement

$^1\text{H}$  NMR,  $^{13}\text{C}$  NMR, and  $^{19}\text{F}$  NMR spectra were recorded on a Bruker Avance 500 or a JEOL ECS-400 spectrometer. Chemical shift values are given in ppm relative to internal  $\text{Me}_4\text{Si}$  (for  $^1\text{H}$  NMR:  $\delta = 0.00$  ppm),  $\text{CDCl}_3$  (for  $^{13}\text{C}$  NMR:  $\delta = 77.0$  ppm),  $\text{C}_6\text{F}_6$  (for  $^{19}\text{F}$  NMR:  $\delta = 0.0$  ppm), and  $(4\text{-MeC}_6\text{H}_4)_2\text{C}(\text{CF}_3)_2$  (for  $^{19}\text{F}$  NMR:  $\delta = 97.9$  ppm). IR spectra were recorded on a Horiba FT-300S spectrometer using the attenuated total reflectance (ATR) method. Mass spectra were measured on a JEOL JMS-T100GCV spectrometer. X-ray diffraction studies were performed on a Bruker APEXII ULTRA instrument equipped with a CCD diffractometer using  $\text{MoK}\alpha$  (graphite monochromated,  $\lambda = 0.71069$  Å) radiation. The structure was solved by direct methods (SIR97) [1]. The positional and thermal parameters of non-hydrogen atoms were refined anisotropically on  $F^2$  by the full-matrix least-squares method using SHELXS-97 [2]. Hydrogen atoms were placed at calculated positions and refined with the riding mode on their corresponding carbon atoms. The CCDC deposition numbers of compounds **2a** and **6a** are 1556804 and 1556803, respectively. All the reactions were conducted under argon or nitrogen atmosphere.

Column chromatography and preparative thin-layer chromatography (PTLC) were conducted on silica gel (Silica Gel 60 N, Kanto Chemical Co., Inc. for column chromatography and Wakogel B-5F, Wako Pure Chemical Industries for PTLC). Tetrahydrofuran (THF), dichloromethane, and *N,N*-dimethylformamide (DMF) were purified by a solvent-purification system (GlassContour) equipped with columns of activated alumina and supported-copper catalyst (Q-5) before use. 1,1,1,3,3,3-Hexafluoropropan-2-ol (HFIP) was distilled from  $\text{CaH}_2$  and stored over activated 4 Å molecular sieves. *N,N,N',N'*-Tetramethylethylenediamine (TMEDA) was distilled from KOH and stored over activated 4 Å molecular sieves. 2-(Trifluoromethyl)-1-alkenes [3-5] and (biaryl-2-yl)acetaldehydes [6] were prepared according to the literature

procedures. Unless otherwise noted, materials were obtained from commercial sources and used directly without further purifications.

## 2. Preparation of 2-(2-aryl-3,3-difluoroallyl)biaryls **1**

### 2-(3,3-Difluoro-2-phenylallyl)biphenyl (**1a**)

To a THF (6.0 mL) solution of 2-iodobiphenyl (105  $\mu$ L, 0.60 mmol) and TMEDA (157  $\mu$ L, 1.0 mmol) was added *n*-BuLi (1.58 M, 0.83 mL, 1.3 mmol) at room temperature. After stirring at the same temperature for 15 min, (3,3,3-trifluoroprop-1-en-2-yl)benzene (206 mg, 1.20 mmol) was added to the reaction mixture. After stirring at 60 °C for 2.5 h, the reaction was quenched with an aqueous NH<sub>4</sub>Cl solution. The organic materials were extracted with CH<sub>2</sub>Cl<sub>2</sub> three times. The combined extracts were washed with brine, and dried over anhydrous Na<sub>2</sub>SO<sub>4</sub>. After removal of the solvent under reduced pressure, the residue was purified by silica gel column chromatography (hexane/ethyl acetate 50:1) to give **1a** (98 mg, 53%) as a colorless liquid.

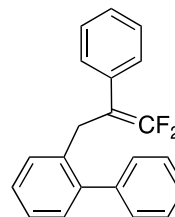

<sup>1</sup>H NMR (500 MHz, CDCl<sub>3</sub>):  $\delta$  3.69 (dd,  $J_{\text{HF}}$  = 2.3, 2.3 Hz, 2H), 7.06–7.07 (m, 2H), 7.14–7.28 (m, 9H), 7.32–7.39 (m, 3H). <sup>13</sup>C NMR (126 MHz, CDCl<sub>3</sub>):  $\delta$  31.2, 91.5 (dd,  $J_{\text{CF}}$  = 21, 14 Hz), 126.2, 127.0, 127.1, 127.5, 128.1, 128.18, 128.21 (dd,  $J_{\text{CF}}$  = 4, 4 Hz), 128.5, 129.2, 130.0, 133.2 (dd,  $J_{\text{CF}}$  = 3, 3 Hz), 135.5 (dd,  $J_{\text{CF}}$  = 3, 3 Hz), 141.3, 142.1, 154.2 (dd,  $J_{\text{CF}}$  = 292, 289 Hz). <sup>19</sup>F NMR (376 MHz, CDCl<sub>3</sub>):  $\delta$  70.9 (d,  $J_{\text{FF}}$  = 40 Hz, 1F), 71.1 (d,  $J_{\text{FF}}$  = 40 Hz, 1F). IR (neat): 3060, 3022, 1724, 1477, 1236, 991, 748, 696 cm<sup>-1</sup>. HRMS (EI):  $m/z$  Calcd for C<sub>21</sub>H<sub>16</sub>F<sub>2</sub> [M]<sup>+</sup>: 306.1220; Found: 306.1213.

## 2-[2-(Biphenyl-4-yl)-3,3-difluoroallyl]biphenyl (**1b**)

Compound **1b** was prepared by the method described for **1a** using 2-iodobiphenyl (105  $\mu$ L, 0.60 mmol) and 4-(3,3,3-trifluoroprop-1-en-2-yl)biphenyl (255 mg, 1.03 mmol). Purification by PTLC (hexane/ethyl acetate 10:1) gave **1b** (154 mg, 67%) as a white solid.

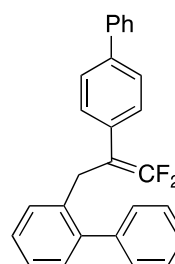

$^1\text{H}$  NMR (500 MHz,  $\text{CDCl}_3$ ):  $\delta$  3.73 (dd,  $J_{\text{HF}} = 2.1, 2.1$  Hz, 2H), 7.14 (d,  $J = 7.5$  Hz, 2H), 7.18 (dd,  $J = 7.5, 1.6$  Hz, 1H), 7.22–7.28 (m, 4H), 7.30–7.45 (m, 9H), 7.53–7.55 (m, 2H).  $^{13}\text{C}$  NMR (126 MHz,  $\text{CDCl}_3$ ):  $\delta$  31.1, 91.3 (dd,  $J_{\text{CF}} = 21, 14$  Hz), 126.3, 126.87, 126.93, 127.0, 127.3, 127.6, 128.1, 128.48, 128.51 (dd,  $J_{\text{CF}} = 4, 4$  Hz), 128.7, 129.2, 130.0, 132.2 (dd,  $J_{\text{CF}} = 4, 4$  Hz), 135.5 (dd,  $J_{\text{CF}} = 3, 2$  Hz), 139.8, 140.5, 141.3, 142.1, 154.4 (dd,  $J_{\text{CF}} = 292, 289$  Hz).  $^{19}\text{F}$  NMR (376 MHz,  $\text{CDCl}_3$ ):  $\delta$  71.6 (d,  $J_{\text{FF}} = 39$  Hz, 1F), 71.8 (d,  $J_{\text{FF}} = 39$  Hz, 1F). IR (neat): 3059, 3028, 1722, 1479, 1238, 999, 841, 764, 700  $\text{cm}^{-1}$ . HRMS (EI):  $m/z$  Calcd for  $\text{C}_{27}\text{H}_{20}\text{F}_2$   $[\text{M}]^+$ : 382.1533; Found: 382.1549.

## 2-[3,3-Difluoro-2-(4-methylphenyl)allyl]biphenyl (**1c**)

Compound **1c** was prepared by the method described for **1a** using 2-iodobiphenyl (106  $\mu$ L, 0.60 mmol) and 1-methyl-4-(3,3,3-trifluoroprop-1-en-2-yl)benzene (134 mg, 0.72 mmol). Purification by PTLC (hexane/ethyl acetate 10:1) gave **1c** (113 mg, 59%) as a white solid.

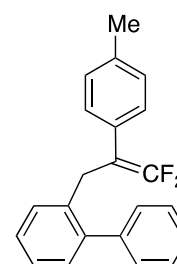

$^1\text{H}$  NMR (400 MHz,  $\text{CDCl}_3$ ):  $\delta$  2.27 (s, 3H), 3.67 (dd,  $J_{\text{HF}} = 2.5, 2.0$  Hz, 2H), 6.97 (d,  $J = 8.3$  Hz, 2H), 7.02 (d,  $J = 8.3$  Hz, 2H), 7.15–7.28 (m, 6H), 7.33–7.41 (m, 3H).  $^{13}\text{C}$  NMR (126 MHz,  $\text{CDCl}_3$ ):  $\delta$  21.1, 31.1, 91.2 (dd,  $J_{\text{CF}} = 18, 15$ ), 126.2, 127.0, 127.5, 128.0 (dd,  $J_{\text{CF}} = 3, 3$  Hz), 128.1, 128.5, 128.9, 129.2, 129.9, 130.2, 135.6 (dd,  $J_{\text{CF}} = 3, 2$  Hz), 136.8, 141.4, 142.1, 154.2 (dd,  $J_{\text{CF}} = 292, 290$  Hz).  $^{19}\text{F}$  NMR (376 MHz,  $\text{CDCl}_3$ ):  $\delta$  71.0 (d,  $J_{\text{FF}} = 41$  Hz, 1F), 71.1 (d,  $J_{\text{FF}} = 41$  Hz, 1F). IR (neat): 3022, 2922,

1722, 1479, 1236, 997, 822, 748, 702  $\text{cm}^{-1}$ . HRMS (EI):  $m/z$  Calcd for  $\text{C}_{22}\text{H}_{18}\text{F}_2$   $[\text{M}]^+$ : 320.1377; Found: 320.1385.

### 2-[3,3-Difluoro-2-(3-methylphenyl)allyl]biphenyl (1d)

Compound **1d** was prepared by the method described for **1a** using 2-iodobiphenyl (39  $\mu\text{L}$ , 0.22 mmol) and 1-methyl-3-(3,3,3-trifluoroprop-1-en-2-yl)benzene (49 mg, 0.26 mmol). Purification by PTLC (pentane) gave **1d** (14 mg, 19%) as a white solid.

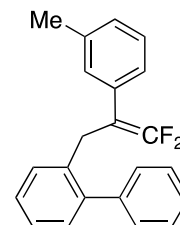

$^1\text{H}$  NMR (500 MHz,  $\text{CDCl}_3$ ):  $\delta$  2.24 (s, 3H), 3.68 (dd,  $J_{\text{HF}} = 2.4, 2.1$  Hz, 2H), 6.86–6.88 (m, 2H), 6.98 (d,  $J = 7.2$  Hz, 1H), 7.08–7.11 (m, 1H), 7.15–7.29 (m, 6H), 7.33–7.40 (m, 3H).  $^{13}\text{C}$  NMR (126 MHz,  $\text{CDCl}_3$ ):  $\delta$  21.4, 31.1, 91.6 (dd,  $J_{\text{CF}} = 17, 16$  Hz), 125.3 (dd,  $J_{\text{CF}} = 4, 3$  Hz), 126.2, 126.9, 127.5, 127.9, 128.0, 128.1, 128.5, 128.9 (dd,  $J_{\text{CF}} = 4, 3$ ), 129.2, 129.9, 133.1, 135.6 (dd,  $J_{\text{CF}} = 3, 3$  Hz), 137.7, 141.4, 142.1, 154.2 (dd,  $J_{\text{CF}} = 290, 290$  Hz).  $^{19}\text{F}$  NMR (470 MHz,  $\text{CDCl}_3$ ):  $\delta$  70.9 (d,  $J_{\text{FF}} = 41$  Hz, 1F), 71.0 (d,  $J_{\text{FF}} = 41$  Hz, 1F). IR (neat): 3060, 2924, 1730, 1479, 1244, 1120, 1018, 787, 748, 702  $\text{cm}^{-1}$ . HRMS (EI):  $m/z$  Calcd for  $\text{C}_{22}\text{H}_{18}\text{F}_2$   $[\text{M}]^+$ : 320.1377; Found: 320.1376.

### 2-[3,3-Difluoro-2-(4-methoxyphenyl)allyl]biphenyl (1e)

Compound **1e** was prepared by the method described for **1a** using 2-iodobiphenyl (88  $\mu\text{L}$ , 0.50 mmol) and 1-methoxy-4-(3,3,3-trifluoroprop-1-en-2-yl)benzene (121 mg, 0.60 mmol). Purification by PTLC (hexane/ethyl acetate 10:1) gave **1e** (92 mg, 55%) as a pale yellow liquid.

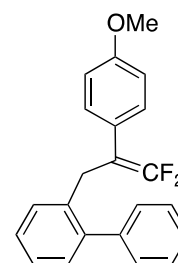

$^1\text{H}$  NMR (500 MHz,  $\text{CDCl}_3$ ):  $\delta$  3.66 (dd,  $J_{\text{HF}} = 2.1, 2.0$  Hz, 2H), 3.71 (s, 3H), 6.73 (d,  $J = 8.8$  Hz, 2H), 6.98 (d,  $J = 8.8$  Hz, 2H), 7.14–7.27 (m, 6H), 7.31–7.39 (m, 3H).  $^{13}\text{C}$

NMR (126 MHz, CDCl<sub>3</sub>):  $\delta$  31.2, 55.1, 91.0 (dd,  $J_{\text{CF}}$  = 19, 16 Hz), 113.6, 125.4, 126.2, 126.9, 127.5, 128.1, 128.5, 129.2, 129.3 (dd,  $J_{\text{CF}}$  = 4, 3 Hz), 129.9, 135.6 (dd,  $J_{\text{CF}}$  = 2, 2 Hz), 141.4, 142.1, 154.1 (dd,  $J_{\text{CF}}$  = 289, 289 Hz), 158.5. <sup>19</sup>F NMR (376 MHz, CDCl<sub>3</sub>):  $\delta$  70.0 (br s, 2F). IR (neat): 3020, 2837, 1726, 1610, 1514, 1296, 1238, 1180, 995, 833, 748, 704 cm<sup>-1</sup>. HRMS (EI):  $m/z$  Calcd for C<sub>22</sub>H<sub>18</sub>F<sub>2</sub>O [M]<sup>+</sup>: 336.1326; Found: 336.1311.

### 2-(3,3-Difluoro-2-phenylallyl)-4'-methylbiphenyl (1f)

Compound **1f** was prepared by the method described for **1a** using 2-bromo-4'-methylbiphenyl (148 mg, 0.60 mmol) and (3,3,3-trifluoroprop-1-en-2-yl)benzene (123 mg, 0.72 mmol). Purification by PTLC (hexane/ethyl acetate 10:1) gave **1f** (74 mg, 38%) as a colorless liquid.

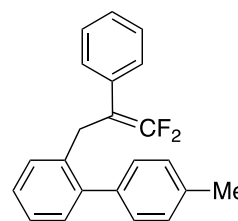

<sup>1</sup>H NMR (500 MHz, CDCl<sub>3</sub>):  $\delta$  2.40 (s, 3H), 3.69 (dd,  $J_{\text{HF}}$  = 2.1, 2.1 Hz, 2H), 7.07–7.10 (m, 4H), 7.14–7.27 (m, 9H). <sup>13</sup>C NMR (100 MHz, CDCl<sub>3</sub>):  $\delta$  21.2, 31.1, 91.5 (dd,  $J_{\text{CF}}$  = 21, 14 Hz), 126.2, 127.1, 127.4, 128.18, 128.21 (dd,  $J_{\text{CF}}$  = 3, 3 Hz), 128.4, 128.8, 129.1, 130.1, 133.3 (dd,  $J_{\text{CF}}$  = 3, 3 Hz), 135.6, 136.6, 138.4, 142.1, 154.3 (dd,  $J_{\text{CF}}$  = 290, 287 Hz). <sup>19</sup>F NMR (470 MHz, CDCl<sub>3</sub>):  $\delta$  71.4 (d,  $J_{\text{FF}}$  = 40 Hz, 1F), 71.6 (d,  $J_{\text{FF}}$  = 40 Hz, 1F). IR (neat): 3024, 2922, 1726, 1481, 1446, 1238, 1005, 991, 758, 696 cm<sup>-1</sup>. HRMS (EI):  $m/z$  Calcd for C<sub>22</sub>H<sub>18</sub>F<sub>2</sub> [M]<sup>+</sup>: 320.1377; Found: 320.1362.

### 2-(3,3-Difluoro-2-phenylallyl)-4'-methoxybiphenyl (1g)

Compound **1g** was prepared by the method described for **1a** using 2-bromo-4'-methoxybiphenyl (158 mg, 0.60 mmol) and (3,3,3-trifluoroprop-1-en-2-yl)benzene (123 mg, 0.72 mmol).

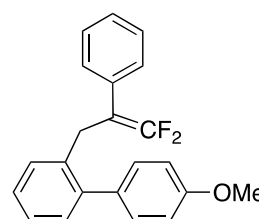

Purification by PTLC (hexane/ethyl acetate 30:1) gave **1g** (15 mg, 7%) as a colorless liquid.

$^1\text{H}$  NMR (400 MHz,  $\text{CDCl}_3$ ):  $\delta$  3.69 (br s, 2H), 3.85 (s, 3H), 6.92 (d,  $J = 8.0$  Hz, 2H), 7.06–7.27 (m, 11H).  $^{13}\text{C}$  NMR (100 MHz,  $\text{CDCl}_3$ ):  $\delta$  30.8, 55.2, 91.6 (dd,  $J_{\text{CF}} = 20$ , 14 Hz), 113.6, 126.2, 127.1, 127.3, 128.18, 128.21 (dd,  $J_{\text{CF}} = 4$ , 4 Hz), 128.5, 130.2, 130.3, 133.3 (dd,  $J_{\text{CF}} = 3$ , 3 Hz), 133.7, 135.7, 141.8, 154.3 (dd,  $J_{\text{CF}} = 290$ , 287 Hz), 158.7.  $^{19}\text{F}$  NMR (376 MHz,  $\text{CDCl}_3$ ):  $\delta$  72.0 (d,  $J_{\text{FF}} = 40$  Hz, 1F), 72.1 (d,  $J_{\text{FF}} = 40$  Hz, 1F). IR (neat): 3064, 2958, 2837, 1726, 1612, 1516, 1481, 1242, 1003, 835, 762  $\text{cm}^{-1}$ .  $^1$ . HRMS (EI):  $m/z$  Calcd for  $\text{C}_{22}\text{H}_{18}\text{F}_2\text{O}$   $[\text{M}]^+$ : 336.1326; Found: 336.1317.

### 3. Preparation of 2-(3,3-difluoroallyl)biaryls **5**

#### 2-(3,3-Difluoroallyl)biphenyl (**5a**)

To a THF (130 mL) suspension of molecular sieves (4 Å, powder, 4.2 g) was added dibromodifluoromethane (5.9 mL, 64 mmol) at  $-78$  °C. After stirring at the same temperature for 30 min, tris(dimethylamino)phosphine (23.4 mL, 129 mmol) was added dropwise to the mixture at  $-78$  °C. After stirring at the same temperature for another 35 min, the reaction mixture was allowed to warm slowly to room temperature, and a THF (20 mL) solution of 2-(biphenyl-2-yl)acetaldehyde (4.23 g, 21.6 mmol) was added slowly to the reaction mixture. After stirring at room temperature for 10 h, the reaction mixture was filtered through a pad of silica gel (ethyl acetate). After removal of the solvent under reduced pressure, the residue was purified by silica gel column chromatography (hexane) to give **5a** (2.56 g, 52%) as a colorless liquid.

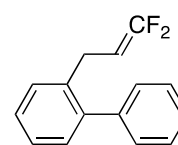

$^1\text{H}$  NMR (500 MHz,  $\text{CDCl}_3$ ):  $\delta$  3.27 (ddd,  $J = 7.9$  Hz,  $J_{\text{HF}} = 1.7$ , 1.7 Hz, 2H), 4.21 (dtd,  $J_{\text{HF}} = 24.9$  Hz,  $J = 7.9$  Hz,  $J_{\text{HF}} = 2.4$  Hz, 1H), 7.22–7.24 (m, 1H), 7.26–7.38 (m, 6H),

7.40–7.44 (m, 2H).  $^{13}\text{C}$  NMR (126 MHz,  $\text{CDCl}_3$ ):  $\delta$  26.1 (d,  $J_{\text{CF}} = 5$  Hz), 77.8 (dd,  $J_{\text{CF}} = 23, 20$  Hz), 126.4, 127.0, 127.6, 128.1, 128.8, 129.0, 130.0, 136.8, 141.2, 141.8, 156.2 (dd,  $J_{\text{CF}} = 288, 286$  Hz).  $^{19}\text{F}$  NMR (376 MHz,  $\text{CDCl}_3$ ):  $\delta$  70.2 (dd,  $J_{\text{FF}} = 45$  Hz,  $J_{\text{FH}} = 25$  Hz, 1F), 72.7 (d,  $J_{\text{FF}} = 45$  Hz, 1F). IR (neat): 3060, 2925, 1745, 1479, 1225, 1174, 752, 702  $\text{cm}^{-1}$ . HRMS (EI):  $m/z$  Calcd for  $\text{C}_{15}\text{H}_{12}\text{F}_2$   $[\text{M}]^+$ : 230.0907; Found: 230.0902.

### 2-(3,3-Difluoroallyl)-4'-methylbiphenyl (**5b**)

Compound **5b** was prepared by the method described for **5a** using 2-(4'-methylbiphenyl-2-yl)acetaldehyde (526 mg, 2.50 mmol). Purification by silica gel column chromatography (hexane) gave **5b** (248 mg, 41%) as a colorless liquid.

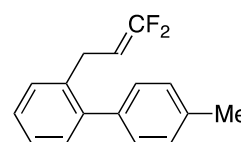

$^1\text{H}$  NMR (500 MHz,  $\text{CDCl}_3$ ):  $\delta$  2.40 (s, 3H), 3.27 (ddd,  $J = 7.9$  Hz,  $J_{\text{HF}} = 1.8, 1.8$  Hz, 2H), 4.22 (dtd,  $J_{\text{HF}} = 25.0$  Hz,  $J = 7.9$  Hz,  $J_{\text{HF}} = 2.3$  Hz, 1H), 7.16–7.19 (m, 2H), 7.20–7.32 (m, 6H).  $^{13}\text{C}$  NMR (126 MHz,  $\text{CDCl}_3$ ):  $\delta$  21.1, 26.1 (d,  $J_{\text{CF}} = 5$  Hz), 77.8 (dd,  $J_{\text{CF}} = 23, 20$  Hz), 126.4, 127.4, 128.8, 128.85, 128.91, 130.1, 136.7, 136.9 (dd,  $J_{\text{CF}} = 2, 2$  Hz), 138.3, 141.7, 156.3 (dd,  $J_{\text{CF}} = 288, 286$  Hz).  $^{19}\text{F}$  NMR (376 MHz,  $\text{CDCl}_3$ ):  $\delta$  70.1 (dd,  $J_{\text{FF}} = 45$  Hz,  $J_{\text{FH}} = 25$  Hz, 1F), 72.7 (d,  $J_{\text{FF}} = 45$  Hz, 1F). IR (neat): 3024, 2924, 1745, 1483, 1225, 1173, 758  $\text{cm}^{-1}$ . HRMS (EI):  $m/z$  Calcd for  $\text{C}_{16}\text{H}_{14}\text{F}_2$   $[\text{M}]^+$ : 244.1064; Found: 244.1052.

### 4'-Bromo-2-(3,3-difluoroallyl)biphenyl (**5c**)

Compound **5c** was prepared by the method described for **5a** using 2-(4'-bromobiphenyl-2-yl)acetaldehyde (1.18 g, 4.29 mmol). Purification by silica gel column chromatography (hexane) gave

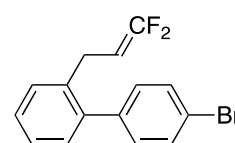



**5c** (438 mg, 33%) as a pale yellow liquid.

$^1\text{H}$  NMR (400 MHz,  $\text{CDCl}_3$ ):  $\delta$  3.24 (d,  $J$  = 7.6 Hz, 2H), 4.15–4.26 (m, 1H), 7.12–7.20 (m, 3H), 7.25–7.42 (m, 3H), 7.54–7.56 (m, 2H).  $^{13}\text{C}$  NMR (100 MHz,  $\text{CDCl}_3$ ):  $\delta$  26.1 (d,  $J_{\text{CF}}$  = 4 Hz), 77.7 (dd,  $J_{\text{CF}}$  = 23, 22 Hz), 121.3, 126.6, 128.0, 129.0, 130.0, 130.8, 131.4, 136.8, 140.2, 140.5, 156.3 (dd,  $J_{\text{CF}}$  = 286, 286 Hz).  $^{19}\text{F}$  NMR (376 MHz,  $\text{CDCl}_3$ ):  $\delta$  70.9 (dd,  $J_{\text{FF}}$  = 45 Hz,  $J_{\text{FH}}$  = 25 Hz, 1F), 73.4 (d,  $J_{\text{FF}}$  = 45 Hz, 1F). IR (neat): 3064, 2931, 1743, 1475, 1225, 1072, 1005, 829, 756  $\text{cm}^{-1}$ . HRMS (EI):  $m/z$  Calcd for  $\text{C}_{15}\text{H}_{11}^{79}\text{BrF}_2 [\text{M}]^+$ : 308.0012; Found: 307.9998.

#### 4. Iodoarylation of 2-(2-aryl-3,3-difluoroallyl)biaryls **1**

##### 9-(Difluoriodomethyl)-9-phenyl-9,10-dihydrophenanthrene (**2a**)

To a HFIP (1.20 mL) and dichloromethane (0.13  $\mu\text{L}$ ) solution of 2-(2-phenyl-3,3-difluoroallyl)biphenyl (**1a**, 31 mg, 0.10 mmol) was added pyridine iodine monochloride ( $\text{PyICl}$ , 49 mg, 0.20 mmol) at 0  $^\circ\text{C}$ . After stirring at 0  $^\circ\text{C}$  for 1 h, the reaction was quenched with an aqueous  $\text{NaHCO}_3$  solution. The organic materials were extracted with  $\text{CHCl}_3$  three times. The combined extracts were washed with an aqueous  $\text{Na}_2\text{S}_2\text{O}_3$  solution and brine, and dried over anhydrous  $\text{Na}_2\text{SO}_4$ . After removal of the solvent under reduced pressure, the residue was purified by PTLC (hexane/ethyl acetate 10:1) to give **2a** (34 mg, 79%) as a white solid.

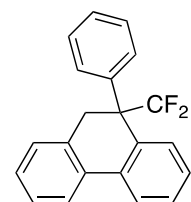

$^1\text{H}$  NMR (500 MHz,  $\text{CDCl}_3$ ):  $\delta$  3.68 (d,  $J$  = 15.8 Hz, 1H), 3.71 (d,  $J$  = 15.8 Hz, 1H), 7.07–7.08 (m, 3H), 7.15–7.24 (m, 5H), 7.42–7.49 (m, 2H), 7.52–7.54 (m, 1H), 7.79 (d,  $J$  = 7.5 Hz, 1H), 7.95 (d,  $J$  = 7.6 Hz, 1H).  $^{13}\text{C}$  NMR (126 MHz,  $\text{CDCl}_3$ ):  $\delta$  38.7, 59.5 (t,  $J_{\text{CF}}$  = 17 Hz), 110.6 (t,  $J_{\text{CF}}$  = 316 Hz), 123.6, 125.1, 127.2, 127.4, 127.50, 127.52, 128.0, 128.46, 128.50, 128.6 (t,  $J_{\text{CF}}$  = 4 Hz), 130.1, 132.7, 133.64, 133.64, 134.6,

136.8.  $^{19}\text{F}$  NMR (470 MHz,  $\text{CDCl}_3$ ):  $\delta$  124.7 (br s). IR (neat): 3068, 1489, 1454, 1126, 1147, 1097, 964, 850, 742, 696, 592  $\text{cm}^{-1}$ . HRMS (EI):  $m/z$  Calcd for  $\text{C}_{21}\text{H}_{15}\text{F}_2\text{I}$   $[\text{M}]^+$ : 432.0186: Found: 432.0166.

### 9-(Biphenyl-4-yl)-9-(difluoroiodomethyl)-9,10-dihydrophenanthrene (2b)

Compound **2b** was synthesized by the method described for **2a** using 2-(2-aryl-3,3-difluoroallyl)biaryl **1b** (38 mg, 0.10 mmol). Purification by PTLC (hexane/ethyl acetate 6:1) gave **2b** (38 mg, 74%) as a white solid.

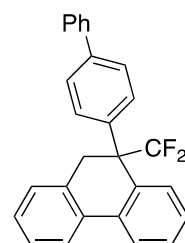

$^1\text{H}$  NMR (500 MHz,  $\text{CDCl}_3$ ):  $\delta$  3.73 (br s, 2H), 7.17–7.18 (m, 2H), 7.22–7.35 (m, 8H), 7.42–7.51 (m, 4H), 7.55–7.57 (m, 1H), 7.82 (d,  $J$  = 7.3 Hz, 1H), 7.97 (d,  $J$  = 7.9 Hz, 1H).  $^{13}\text{C}$  NMR (126 MHz,  $\text{CDCl}_3$ ):  $\delta$  38.8, 59.4 (t,  $J_{\text{CF}}$  = 18 Hz), 110.6 (t,  $J_{\text{CF}}$  = 316 Hz), 123.6, 125.1, 126.1, 126.9, 127.27, 127.32, 127.4, 128.1, 128.5, 128.65, 128.65, 128.65, 130.5, 132.66, 132.66, 133.6, 134.6, 136.8, 140.1, 140.2.  $^{19}\text{F}$  NMR (470 MHz,  $\text{CDCl}_3$ ):  $\delta$  124.7 (br s, 2F). IR (neat): 3064, 3032, 1487, 1452, 1147, 1095, 1007, 964, 876, 762, 704  $\text{cm}^{-1}$ . HRMS (EI):  $m/z$  Calcd for  $\text{C}_{27}\text{H}_{19}\text{F}_2\text{I}$   $[\text{M}]^+$ : 508.0500: Found: 508.0480.

### 9-(Difluoroiodomethyl)-9-(4-methylphenyl)-9,10-dihydrophenanthrene (2c)

Compound **2c** was synthesized by the method described for **2a** using 2-(2-aryl-3,3-difluoroallyl)biaryl **1c** (117 mg, 0.37 mmol). Purification by silica gel column chromatography (hexane/ethyl acetate 10:1) gave **2c** (134 mg, 82%) as a white solid.

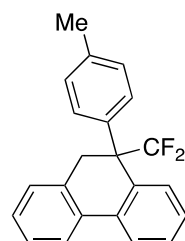

$^1\text{H}$  NMR (400 MHz,  $\text{CDCl}_3$ ):  $\delta$  2.12 (s, 3H), 3.66 (s, 2H), 6.85 (d,  $J$  = 8.2 Hz, 2H), 7.04 (d,  $J$  = 8.2 Hz, 2H), 7.11–7.16 (m, 2H), 7.20–7.23 (m, 1H), 7.38–7.46 (m, 2H), 7.50–

7.53 (m, 1H), 7.77 (dd,  $J = 7.6, 1.6$  Hz, 1H), 7.93 (d,  $J = 7.2$  Hz, 1H).  $^{13}\text{C}$  NMR (100 MHz,  $\text{CDCl}_3$ ):  $\delta$  20.9, 38.7, 59.3 (t,  $J_{\text{CF}} = 17$  Hz), 111.0 (t,  $J_{\text{CF}} = 317$  Hz), 123.5, 125.0, 127.2, 127.3, 128.0, 128.3, 128.4, 128.5, 128.6 (t,  $J_{\text{CF}} = 4$  Hz), 130.0, 132.81, 132.81, 133.6, 134.5, 136.9, 137.2.  $^{19}\text{F}$  NMR (376 MHz,  $\text{CDCl}_3$ ):  $\delta$  125.2 (br s, 2F). IR (neat): 3026, 2922, 1512, 1454, 1149, 1126, 1095, 964, 874, 856, 746  $\text{cm}^{-1}$ . HRMS (EI):  $m/z$  Calcd for  $\text{C}_{22}\text{H}_{17}\text{F}_2\text{I}$   $[\text{M}]^+$ : 446.0343; Found: 446.0322.

### 9-(Difluoriodomethyl)-9-(3-methylphenyl)-9,10-dihydrophenanthrene (2d)

Compound **2d** was synthesized by the method described for **2a** using 2-(2-aryl-3,3-difluoroallyl)biaryl **1d** (13 mg, 42  $\mu\text{mol}$ ). Purification by PTLC (hexane/ethyl acetate 10:1) gave **2d** (10 mg, 53%) as a white solid.

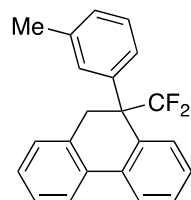

$^1\text{H}$  NMR (500 MHz,  $\text{CDCl}_3$ ):  $\delta$  2.16 (s, 3H), 3.66 (d,  $J = 15.4$  Hz, 1H), 3.70 (d,  $J = 15.4$  Hz, 1H), 6.90–6.97 (m, 4H), 7.15–7.19 (m, 2H), 7.24–7.25 (m, 1H), 7.43 (ddd,  $J = 7.5, 7.5, 1.6$  Hz, 1H), 7.48 (ddd,  $J = 7.7, 7.7, 1.5$  Hz, 1H), 7.53–7.56 (m, 1H), 7.80 (dd,  $J = 7.7, 1.5$  Hz, 1H), 7.93 (d,  $J = 8.8$  Hz, 1H).  $^{13}\text{C}$  NMR (100 MHz,  $\text{CDCl}_3$ ):  $\delta$  21.5, 38.8, 59.4 (t,  $J_{\text{CF}} = 17$  Hz), 110.9 (t,  $J_{\text{CF}} = 318$  Hz), 123.5, 125.0, 127.1, 127.28, 127.31, 127.31, 127.9, 128.32, 128.39, 128.4, 128.7, 130.9, 132.8, 133.4, 133.6, 134.6, 136.87, 136.87.  $^{19}\text{F}$  NMR (376 MHz,  $\text{CDCl}_3$ ):  $\delta$  126.0 (br s, 2F). IR (neat): 3064, 2970, 2362, 1489, 1452, 1126, 964, 845, 737  $\text{cm}^{-1}$ . HRMS (EI):  $m/z$  Calcd for  $\text{C}_{22}\text{H}_{17}\text{F}_2\text{I}$   $[\text{M}]^+$ : 446.0343; Found: 446.0360.

### 9-(Difluoroiodomethyl)-9-(4-methoxyphenyl)-9,10-dihydrophenanthrene (2e)

Compound **2e** was synthesized by the method described for **2a** using 2-(2-aryl-3,3-difluoroallyl)biaryl **1e** (34 mg, 0.10 mmol). Purification by PTLC (hexane/ethyl acetate 5:1) gave **2e** (38 mg, 83%) as a white solid.

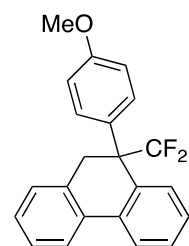

$^1\text{H}$  NMR (500 MHz,  $\text{CDCl}_3$ ):  $\delta$  3.64 (s, 3H), 3.66 (br s, 2H), 6.60 (d,  $J$  = 8.9 Hz, 2H), 7.07 (d,  $J$  = 8.9 Hz, 2H), 7.16–7.19 (m, 2H), 7.23–7.26 (m, 1H), 7.41–7.48 (m, 2H), 7.53–7.55 (m, 1H), 7.80 (d,  $J$  = 7.7 Hz, 1H), 7.93 (d,  $J$  = 7.7 Hz, 1H).  $^{13}\text{C}$  NMR (100 MHz,  $\text{CDCl}_3$ ):  $\delta$  38.7, 55.0, 59.0 (t,  $J_{\text{CF}}$  = 17 Hz), 111.0 (t,  $J_{\text{CF}}$  = 322 Hz), 112.9, 123.5, 125.1, 127.2, 127.3, 128.0, 128.4, 128.49, 128.49, 131.3, 132.81, 132.81, 133.6, 134.5, 136.9, 158.7.  $^{19}\text{F}$  NMR (470 MHz,  $\text{CDCl}_3$ ):  $\delta$  124.5 (br s, 2F). IR (neat): 3064, 2837, 1606, 1510, 1454, 1259, 1188, 1093, 964, 804, 752  $\text{cm}^{-1}$ . HRMS (EI):  $m/z$  Calcd for  $\text{C}_{22}\text{H}_{17}\text{F}_2\text{IO}$   $[\text{M}]^+$ : 462.0292; Found: 462.0293.

### 10-(Difluoroiodomethyl)-2-methyl-10-phenyl-9,10-dihydrophenanthrene (2f)

Compound **2f** was synthesized by the method described for **2a** using 2-(2-aryl-3,3-difluoroallyl)biaryl **1f** (67 mg, 0.21 mmol). Purification by PTLC (hexane/ethyl acetate 10:1) gave **2f** (50 mg, 54%) as a colorless liquid.

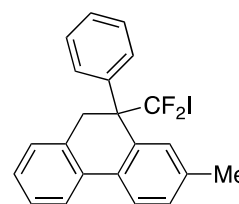

$^1\text{H}$  NMR (500 MHz,  $\text{CDCl}_3$ ):  $\delta$  2.49 (s, 3H), 3.64 (d,  $J$  = 15.1 Hz, 1H), 3.69 (d,  $J$  = 15.1 Hz, 1H), 7.04–7.08 (m, 3H), 7.11–7.13 (m, 2H), 7.17–7.21 (m, 3H), 7.27 (d,  $J$  = 7.9 Hz, 1H), 7.47–7.50 (m, 1H), 7.67 (d,  $J$  = 7.9 Hz, 1H), 7.74 (s, 1H).  $^{13}\text{C}$  NMR (126 MHz,  $\text{CDCl}_3$ ):  $\delta$  21.7, 38.9, 59.5 (t,  $J_{\text{CF}}$  = 17 Hz), 110.8 (t,  $J_{\text{CF}}$  = 315 Hz), 123.2, 124.9, 127.3, 127.47, 127.47, 127.54, 128.4, 129.1, 129.3, 130.1, 131.9, 132.4, 133.7, 136.7, 136.94, 136.94.  $^{19}\text{F}$  NMR (376 MHz,  $\text{CDCl}_3$ ):  $\delta$  126.1 (br s, 2F). IR

(neat): 3033, 2918, 1487, 1448, 1151, 1128, 1099, 974, 841, 766, 739, 694  $\text{cm}^{-1}$ .

HRMS (EI):  $m/z$  Calcd for  $\text{C}_{22}\text{H}_{17}\text{F}_2\text{I}$   $[\text{M}]^+$ : 446.0343; Found: 446.0322.

### 10-(Difluoriodomethyl)-2-methoxy-10-phenyl-9,10-dihydrophenanthrene (2g)

Compound **2g** was synthesized by the method described for **2a**

using 2-(2-aryl-3,3-difluoroallyl)biaryl **1g** (12 mg, 37  $\mu\text{mol}$ ).

Purification by PTLC (hexane/ethyl acetate 10:1) gave **2g**

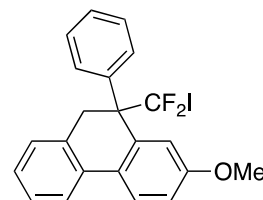

(14 mg, 80%) as a white solid.

$^1\text{H}$  NMR (500 MHz,  $\text{CDCl}_3$ ):  $\delta$  3.64 (d,  $J = 14.9$  Hz, 1H), 3.69 (d,  $J = 14.9$  Hz, 1H), 3.94 (s, 3H), 7.02 (dd,  $J = 8.7, 2.5$  Hz, 1H), 7.07–7.15 (m, 5H), 7.19–7.23 (m, 3H), 7.45–7.47 (m, 1H), 7.51 (d,  $J = 2.5$  Hz, 1H), 7.73 (d,  $J = 8.7$  Hz, 1H).  $^{13}\text{C}$  NMR (100 MHz,  $\text{CDCl}_3$ ):  $\delta$  38.8, 55.5, 59.6 (t,  $J_{\text{CF}} = 17$  Hz), 110.4 (t,  $J_{\text{CF}} = 321$  Hz), 113.5, 115.0 (t,  $J_{\text{CF}} = 3.8$  Hz) 122.9, 126.2, 127.1, 127.3, 127.5, 127.57, 127.57, 127.57, 128.4, 130.1, 131.9, 133.6, 138.1, 158.6.  $^{19}\text{F}$  NMR (470 MHz,  $\text{CDCl}_3$ ):  $\delta$  125.0 (br s, 2F). IR (neat): 3060, 2960, 1566, 1487, 1454, 1230, 1097, 1043, 972, 841, 729  $\text{cm}^{-1}$ . HRMS (EI):  $m/z$  Calcd for  $\text{C}_{22}\text{H}_{17}\text{F}_2\text{IO}$   $[\text{M}]^+$ : 462.0292; Found: 462.0291.

## 5. Synthesis of dihydrophenanthrene bearing a $\text{CHF}_2$ group

### 9-(Difluoromethyl)-9-phenyl-9,10-dihydrophenanthrene (4a)

After refluxing a DMF (1.0 mL) solution of **2a** (41 mg, 96  $\mu\text{mol}$ ) for

15 h, the organic materials were extracted with a hexane/ethyl acetate 1:1 mixed solvent three times. The combined extracts were

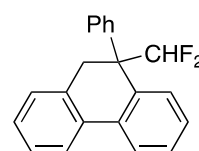

washed with brine, and dried over anhydrous  $\text{Na}_2\text{SO}_4$ . After removal of the solvent under reduced pressure, the residue was purified by silica gel column

chromatography (hexane/ethyl acetate 10:1) to give **4a** (29 mg, 97%) as a colorless liquid.

$^1\text{H}$  NMR (400 MHz,  $\text{CDCl}_3$ ):  $\delta$  3.36 (d,  $J$  = 15.6 Hz, 1H), 3.58 (d,  $J$  = 15.6 Hz, 1H), 6.25 (t,  $J_{\text{HF}}$  = 55.8 Hz, 1H), 7.08–7.24 (m, 8H), 7.34–7.49 (m, 3H), 7.63 (d,  $J$  = 7.2 Hz, 1H), 7.83 (d,  $J$  = 7.6 Hz, 1H).  $^{13}\text{C}$  NMR (100 MHz,  $\text{CDCl}_3$ ):  $\delta$  35.0 (t,  $J_{\text{CF}}$  = 5 Hz), 50.8 (t,  $J_{\text{CF}}$  = 19 Hz), 118.5 (t,  $J_{\text{CF}}$  = 248 Hz), 123.6, 124.9, 127.0, 127.3, 127.6, 127.8, 127.9, 128.0, 128.2, 128.7, 128.8, 133.1, 133.6, 134.8, 136.5, 138.2.  $^{19}\text{F}$  NMR (470 MHz,  $\text{CDCl}_3$ ):  $\delta$  36.5 (dd,  $J_{\text{FF}}$  = 274 Hz,  $J_{\text{FH}}$  = 56 Hz, 1F), 41.3 (dd,  $J_{\text{FF}}$  = 274 Hz,  $J_{\text{FH}}$  = 56 Hz, 1F). IR (neat): 3064, 2970, 1489, 1454, 1124, 1065, 741, 698  $\text{cm}^{-1}$ . HRMS (EI):  $m/z$  Calcd for  $\text{C}_{21}\text{H}_{16}\text{F}_2$   $[\text{M}]^+$ : 306.1220; Found: 306.1211.

## 6. Iodoarylation of 2-(3,3-difluoroallyl)biaryls 5

### 5,5-Difluoro-6-iodo-6,7-dihydro-5*H*-dibenzo[*a,c*][7]annulene (**6a**)

To a HFIP (2.5 mL) and dichloromethane (1.5  $\mu\text{L}$ ) solution of *N*-iodosuccinimide (NIS, 27 mg, 0.12 mmol) was added trimethylsilyl trifluoromethanesulfonate (22  $\mu\text{L}$ , 0.12 mmol) at 0 °C. After stirring at the same temperature for 10 min, a dichloromethane (1.0 mL) solution of 2-(3,3-difluoroallyl)biphenyl (**5a**, 23 mg, 0.10 mmol) was added to the reaction mixture. After stirring at 0 °C for 40 min, the reaction was quenched with an aqueous  $\text{NaHCO}_3$  solution. The organic materials were extracted with dichloromethane three times. The combined extracts were washed with an aqueous  $\text{Na}_2\text{S}_2\text{O}_3$  solution and brine, and dried over anhydrous  $\text{Na}_2\text{SO}_4$ . After removal of the solvent under reduced pressure, the residue was purified by PTLC (hexane/ethyl acetate 10:1) to give **6a** (33 mg, 92%) as a colorless liquid.

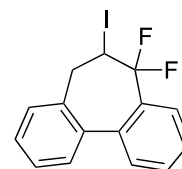

$^1\text{H}$  NMR (500 MHz,  $\text{CDCl}_3$ ):  $\delta$  3.06 (dd,  $J = 14.8, 4.9$ , 1H), 3.38 (dd,  $J = 14.8, 6.0$  Hz, 1H), 4.91–4.98 (m, 1H), 7.28–7.35 (m, 2H), 7.41–7.44 (m, 3H), 7.47 (d,  $J = 7.8$  Hz, 1H), 7.55–7.59 (m, 1H), 7.70 (d,  $J = 7.4$  Hz, 1H).  $^{13}\text{C}$  NMR (126 MHz,  $\text{CDCl}_3$ ):  $\delta$  35.1 (dd,  $J_{\text{CF}} = 27, 27$  Hz), 41.7, 118.9 (dd,  $J_{\text{CF}} = 247, 247$  Hz), 125.2, 127.5, 128.0, 128.20, 128.23, 129.2, 129.7, 131.0, 131.4 (dd,  $J_{\text{CF}} = 24, 24$  Hz), 134.6, 138.6 (dd,  $J_{\text{CF}} = 5, 5$  Hz), 140.3.  $^{19}\text{F}$  NMR (376 MHz,  $\text{DMSO}-d_6$ , 120  $^\circ\text{C}$ ):  $\delta$  72.3 (d,  $J_{\text{FF}} = 236$  Hz, 1F), 86.5 (d,  $J_{\text{FF}} = 236$  Hz, 1F). IR (neat): 3068, 3030, 1450, 1149, 1055, 989, 752, 598  $\text{cm}^{-1}$ . HRMS (EI):  $m/z$  Calcd for  $\text{C}_{15}\text{H}_{11}\text{F}_2\text{I}$   $[\text{M}]^+$ : 355.9873; Found: 355.9866.

### 5,5-Difluoro-6-iodo-3-methyl-6,7-dihydro-5*H*-dibenzo[*a,c*][7]annulene (**6b**)

Compound **6b** was synthesized by the method described for **6a** using 2-(3,3-difluoroallyl)biaryl **5b** (98 mg, 0.40 mmol). Purification by PTLC (hexane/ethyl acetate 10:1) gave **6b** (89 mg, 60%) as a colorless oil.

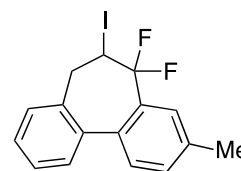

$^1\text{H}$  NMR (400 MHz,  $\text{CDCl}_3$ ):  $\delta$  2.46 (s, 3H), 3.06 (dd,  $J = 14.7, 5.4$  Hz, 1H), 3.38 (dd,  $J = 14.7, 6.0$  Hz, 1H), 4.89–4.98 (m, 1H), 7.27–7.35 (m, 2H), 7.37–7.42 (m, 4H), 7.51 (br s, 1H).  $^{13}\text{C}$  NMR (100 MHz,  $\text{CDCl}_3$ ):  $\delta$  21.3, 35.2 (dd,  $J_{\text{CF}} = 28, 28$  Hz), 41.8, 119.0 (dd,  $J_{\text{CF}} = 245, 245$  Hz), 125.9 (dd,  $J_{\text{CF}} = 7, 7$  Hz), 127.8, 128.1, 128.2, 129.2, 129.6, 131.3, 131.6, 134.6, 135.7 (dd,  $J_{\text{CF}} = 5, 5$  Hz), 137.6, 140.4.  $^{19}\text{F}$  NMR (376 MHz,  $\text{DMSO}-d_6$ , 120  $^\circ\text{C}$ ):  $\delta$  72.3 (d,  $J_{\text{FF}} = 234$  Hz, 1F), 86.6 (d,  $J_{\text{FF}} = 234$  Hz, 1F). IR (neat): 3030, 2952, 1481, 1448, 1184, 1151, 1043, 829, 758  $\text{cm}^{-1}$ . HRMS (EI):  $m/z$  Calcd for  $\text{C}_{16}\text{H}_{13}\text{F}_2\text{I}$   $[\text{M}]^+$ : 370.0030; Found: 370.0040.

### 3-Bromo-5,5-difluoro-6-iodo-6,7-dihydro-5*H*-dibenzo[*a,c*][7]annulene (**6c**)

Compound **6c** was synthesized by the method described for **6a** using 2-(3,3-difluoroallyl)biaryl **5c** (62 mg, 0.20 mmol). Purification by PTLC (hexane/ethyl acetate 10:1) gave **6c** (54 mg, 62%) as a colorless oil.

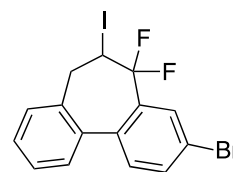

$^1\text{H}$  NMR (400 MHz,  $\text{CDCl}_3$ ):  $\delta$  3.07 (dd,  $J = 14.8, 5.2$ , 1H), 3.38 (dd,  $J = 14.8, 6.4$  Hz, 1H), 4.88–4.98 (m, 1H), 7.29 (d,  $J = 6.8$  Hz, 1H), 7.33–7.46 (m, 4H), 7.71 (dd,  $J = 8.2, J_{\text{HF}} = 2.0$  Hz, 1H), 7.85 (d,  $J = 2.0$  Hz, 1H).  $^{13}\text{C}$  NMR (100 MHz,  $\text{CDCl}_3$ ):  $\delta$  34.2 (dd,  $J_{\text{CF}} = 28, 28$  Hz), 41.6, 118.2 (dd,  $J_{\text{CF}} = 247, 247$  Hz), 121.6, 128.1, 128.39, 128.43, 128.5 (dd,  $J_{\text{CF}} = 8, 8$  Hz), 129.4, 131.2, 133.2 (dd,  $J_{\text{CF}} = 25, 25$  Hz), 134.1, 134.5, 137.6 (dd,  $J_{\text{CF}} = 4, 4$  Hz), 139.2.  $^{19}\text{F}$  NMR (376 MHz,  $\text{DMSO}-d_6$ , 120  $^\circ\text{C}$ ):  $\delta$  71.7 (d,  $J_{\text{FF}} = 240$  Hz, 1F), 85.9 (d,  $J_{\text{FF}} = 240$  Hz, 1F). IR (neat): 3064, 2960, 1473, 1448, 1209, 1153, 1057, 1043, 1003, 831, 756  $\text{cm}^{-1}$ . HRMS (EI):  $m/z$  Calcd for  $\text{C}_{15}\text{H}_{10}^{81}\text{BrF}_2\text{I}$   $[\text{M}]^+$ : 435.8958; Found: 435.8943.

## 7. Synthesis of difluorodibenzo[*a,c*][7]annulene

### 5,5-Difluoro-5*H*-dibenzo[*a,c*][7]annulene (**7a**)

To a THF (2.6 mL) solution of **6a** (94 mg, 0.26 mmol) was added diazabicyclo[5.4.0]undec-7-ene (80  $\mu\text{L}$ , 0.52 mmol). After being refluxed for 2 h, the reaction mixture was cooled to room temperature

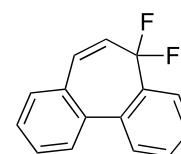

and an aqueous  $\text{NH}_4\text{Cl}$  solution was added. The organic materials were extracted with  $\text{CHCl}_3$  three times. The combined extracts were washed with brine, and dried over anhydrous  $\text{Na}_2\text{SO}_4$ . After removal of the solvent under reduced pressure, **7a** (59 mg, 98%) was obtained as a colorless liquid.



$^1\text{H}$  NMR (500 MHz,  $\text{CDCl}_3$ ):  $\delta$  6.28 (dt,  $J = 10.8$  Hz,  $J_{\text{HF}} = 10.5$  Hz, 1H), 6.81 (d,  $J = 10.8$  Hz, 1H), 7.32–7.47 (m, 5H), 7.63–7.74 (m, 3H).  $^{13}\text{C}$  NMR (126 MHz,  $\text{CDCl}_3$ ):  $\delta$  116.4 (t,  $J_{\text{CF}} = 240$  Hz), 122.1 (t,  $J_{\text{CF}} = 8$  Hz), 127.5, 127.8, 128.0, 129.38, 129.46 (t,  $J_{\text{CF}} = 34$  Hz), 129.49, 129.8, 131.1, 132.9 (t,  $J_{\text{CF}} = 10$  Hz), 133.1, 135.4 (t,  $J_{\text{CF}} = 4$  Hz), 137.0 (t,  $J_{\text{CF}} = 28$  Hz), 138.3.  $^{19}\text{F}$  NMR (376 MHz,  $\text{DMSO}-d_6$ , 120  $^\circ\text{C}$ ):  $\delta$  65.7 (br s, 2F). IR (neat): 3064, 2931, 1645, 1487, 1446, 1294, 1159, 1043, 1001, 764, 737  $\text{cm}^{-1}$ .

## 8. References

1. Altomare, A.; Burla, M. C.; Camalli, M.; Cascarano, G. L.; Giacovazzo, C.; Guagliardi, A.; Moliterni, A. G. G.; Polidori, G.; Spagna, R. *J. Appl. Crystallogr.*, **1999**, 32, 115–119.
2. Sheldrick, G. M. *Programs for Crystal Structure Analysis (Release 972)*; Institut für Anorganische Chemie der Universität: Göttingen, Germany, 1998.
3. Ichitsuka, T.; Fujita, T.; Arita, T.; Ichikawa, J. *Angew. Chem. Int. Ed.*, **2014**, 53, 7564–7568.
4. Ichitsuka, T.; Fujita, T.; Ichikawa, J. *ACS Catal.*, **2015**, 5, 5947–5950.
5. Fujita, T.; Takazawa, M.; Sugiyama, K.; Suzuki, N.; Ichikawa, J. *Org. Lett.*, **2017**, 19, 588–591.
6. Fujita, T.; Takahashi I.; Hayashi, M.; Wang, J.; Fuchibe, K.; Ichikawa, J. *Eur. J. Org. Chem.*, **2017**, 262–265.

## 9. $^1\text{H}$ , $^{13}\text{C}$ , and $^{19}\text{F}$ NMR charts

### 9-(Difluoriodomethyl)-9-phenyl-9,10-dihydrophenanthrene (2a)

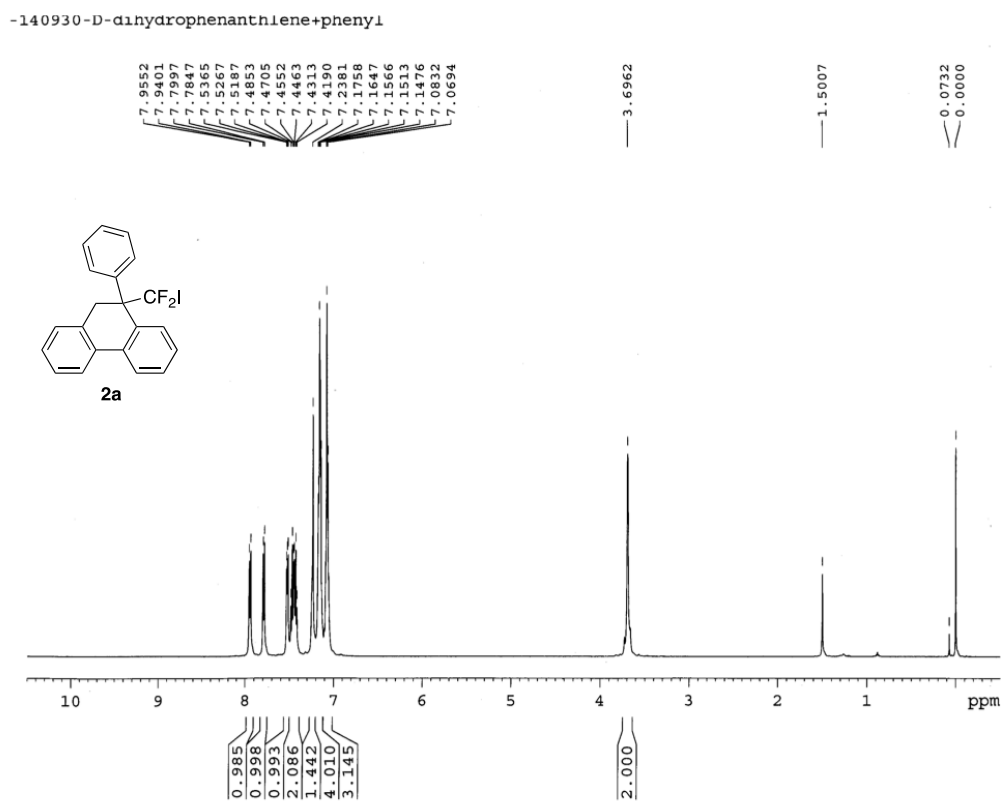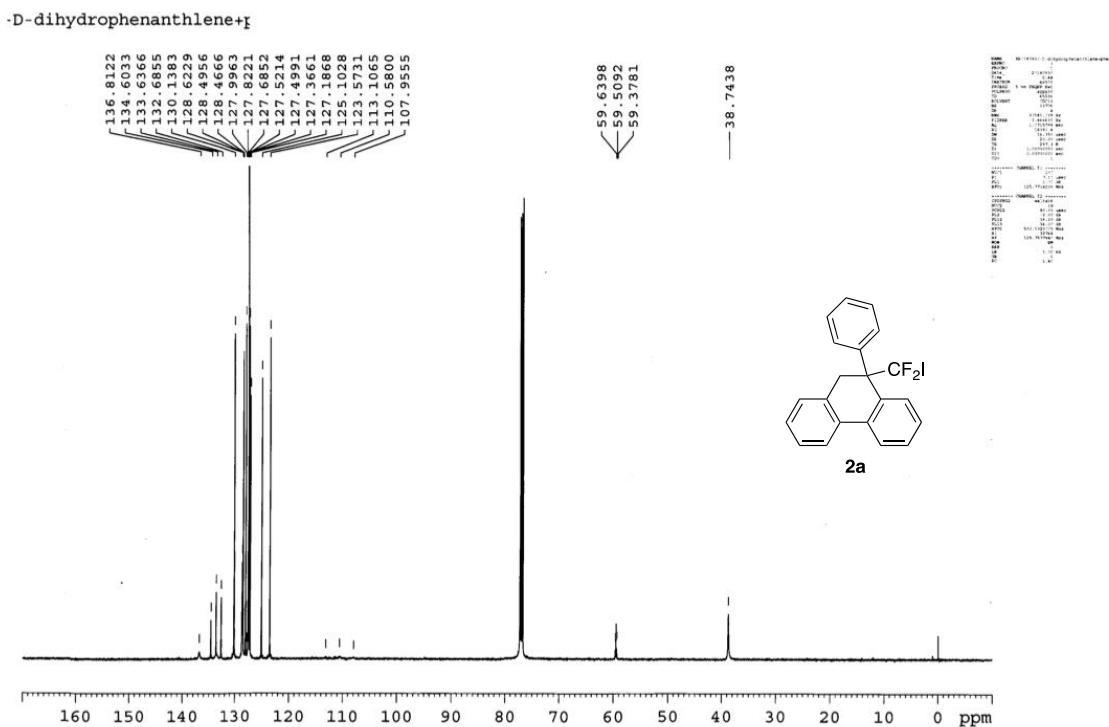

—124.6859

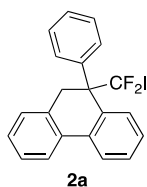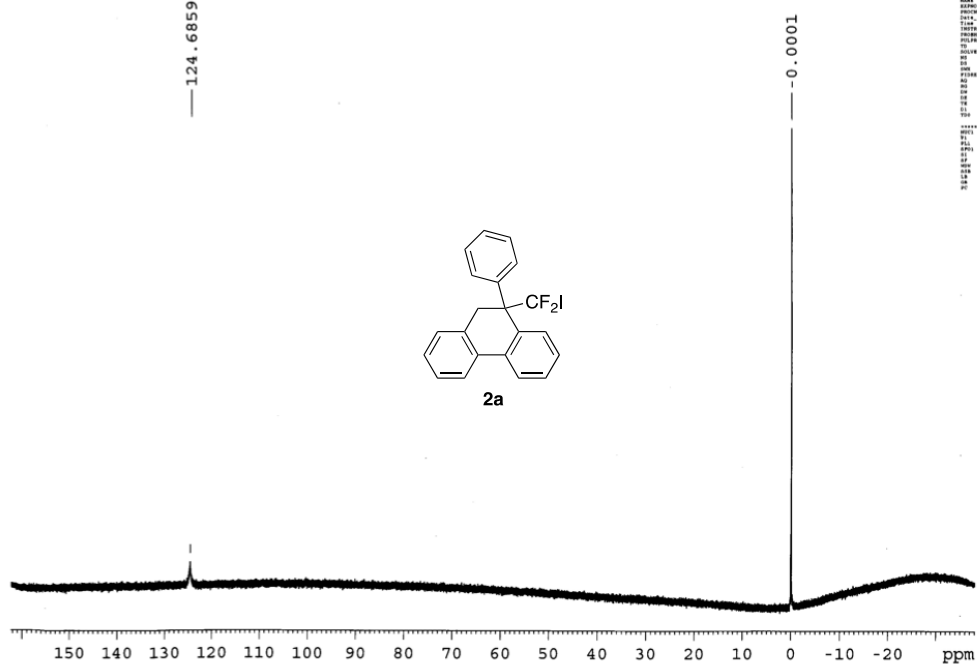

```

NAME      KR-150115-0-dsctophosphate.knew.ph
PROJ      1
EXPNO     1
PROCNO    1
DATE_     20031015
TIME      1.38
INSTRUM    agt01
F2PROC    5  mmm  agt01
PULPROG    zgpg30
PR      0  0.00000000
SOLVENT    CDCl3
DO        0
DS        0
SWH        400.142180 MHz
F2 - F1     9.47188800
AQ         1.00000000 sec
RG          64.0
SQ         5.10000000
SW         5.10000000
WDW         EM
SSB         0.00000000
GB         0.00000000
TE        295.5 K
T0         10.00000000
T1
T2
***** CHANNEL F1 *****
HF1        130.7
P1         4.00000000
PL1        -1.00 dB
SFO1       470.1310712 MHz
P2         4.00000000
PL2        -1.00 dB
SFO2       470.1310712 MHz
WDW         EM
SSB         0.00000000
GB         0.00000000
TE        300.2 K
T0         10.00000000
T1
T2

```

40927-D-dihydrophenanthrene+biphenyl-

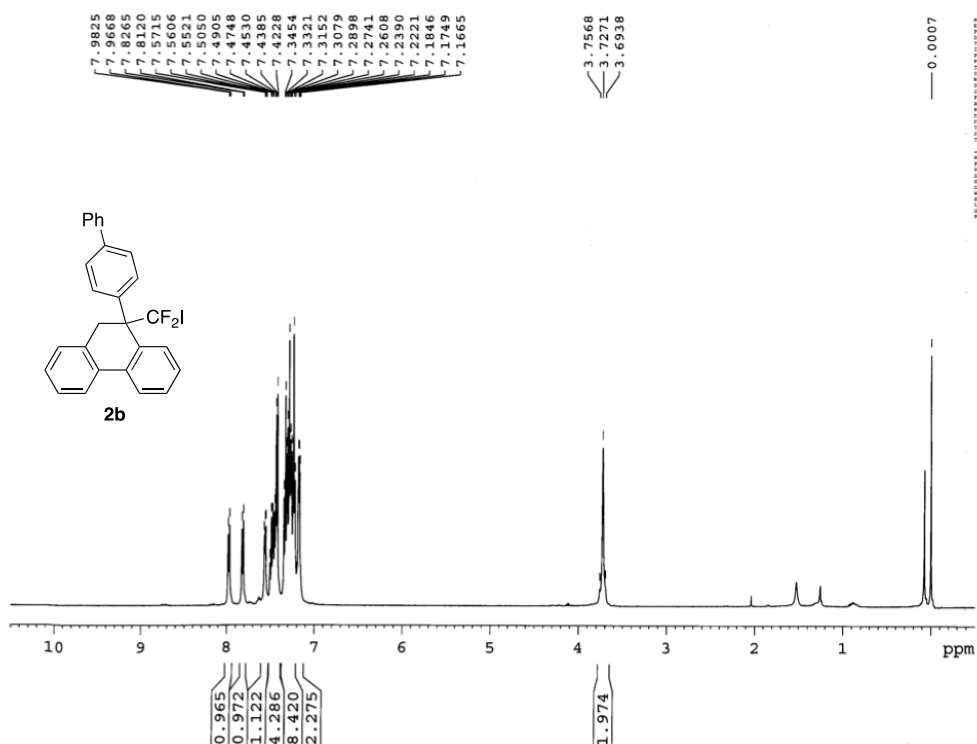[illegible]

Chemical structure of **2b**: c1ccc(cc1)C(Cc2ccccc2)C(c3ccccc3)C(I)F

<sup>13</sup>C NMR spectrum (CDCl<sub>3</sub>) of compound **2b**. The x-axis represents the chemical shift in ppm, ranging from 0 to 160. The spectrum shows several peaks in the aromatic region (110-140 ppm), a triplet for the solvent CDCl<sub>3</sub> at 77.0028 ppm, and two aliphatic carbon peaks at 59.4942 and 59.2202 ppm. A peak at 38.7952 ppm is assigned to the CF<sub>2</sub> group.

Peak list (ppm): 140.1696, 140.0735, 136.7617, 134.5976, 133.6339, 132.6594, 130.5263, 128.6457, 128.5226, 128.0657, 127.4154, 127.3187, 127.2868, 126.8969, 126.1411, 125.1217, 123.6278, 113.1533, 110.6454, 108.1375, 77.0028, 59.4942, 59.3558, 59.2202, 38.7952.

Chemical structure of compound **2b** is shown above the spectrum. The structure is a fluorene derivative with a phenyl group and a  $\text{CF}_2$  group attached to the central carbon atom.

$^1\text{H}$  NMR spectrum (CDCl<sub>3</sub>) of compound **2b**. The x-axis represents the chemical shift in ppm, ranging from 150 to -20. The spectrum shows a multiplet for aromatic protons between 7.0 and 7.5 ppm, a singlet for the  $\text{CF}_2$  group at 124.6977 ppm, and a reference peak at 0.0007 ppm.

# 9-(Difluoriodomethyl)-9-(4-methylphenyl)-9,10-dihydrophenanthrene (2c)

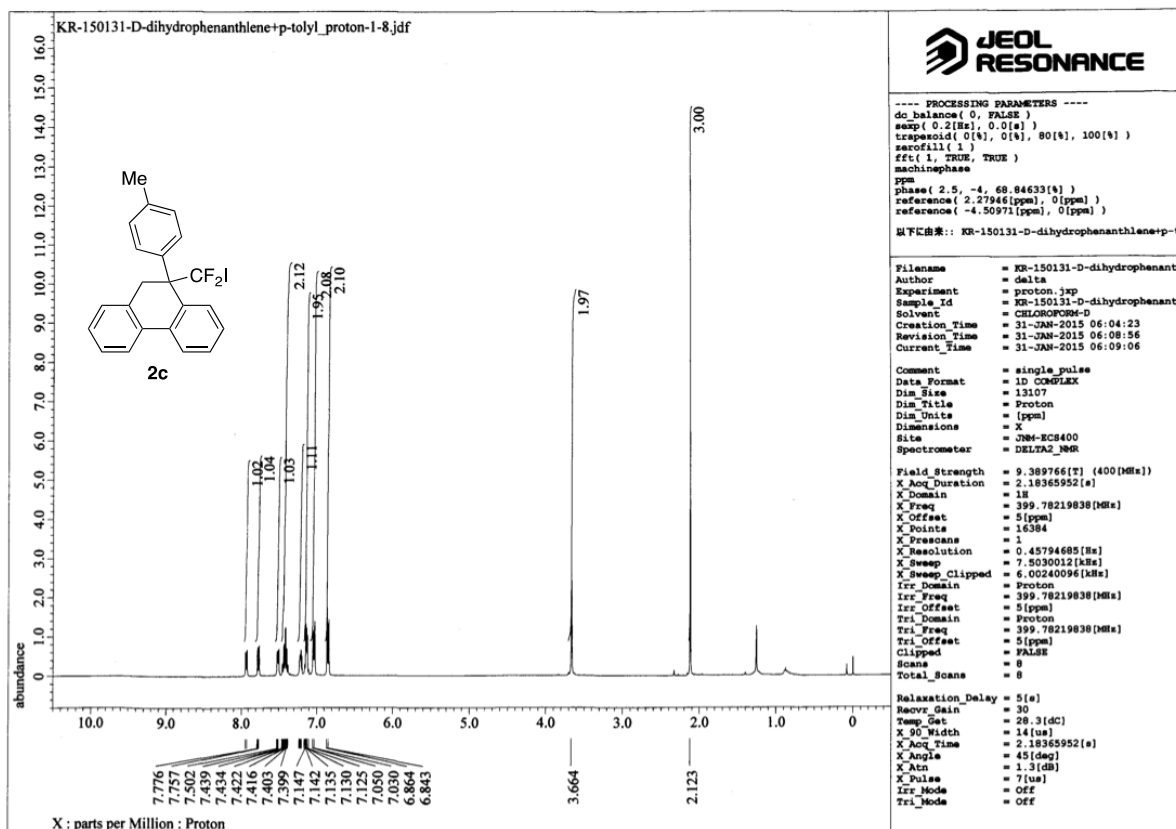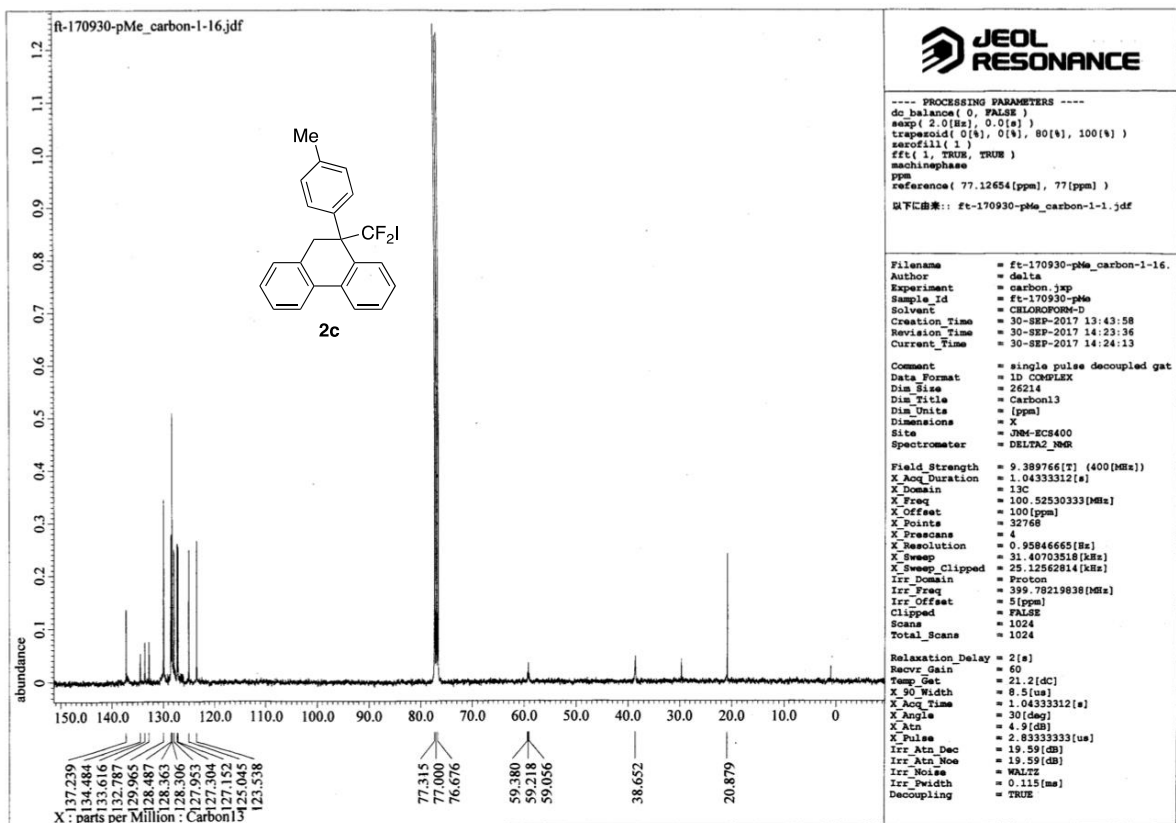

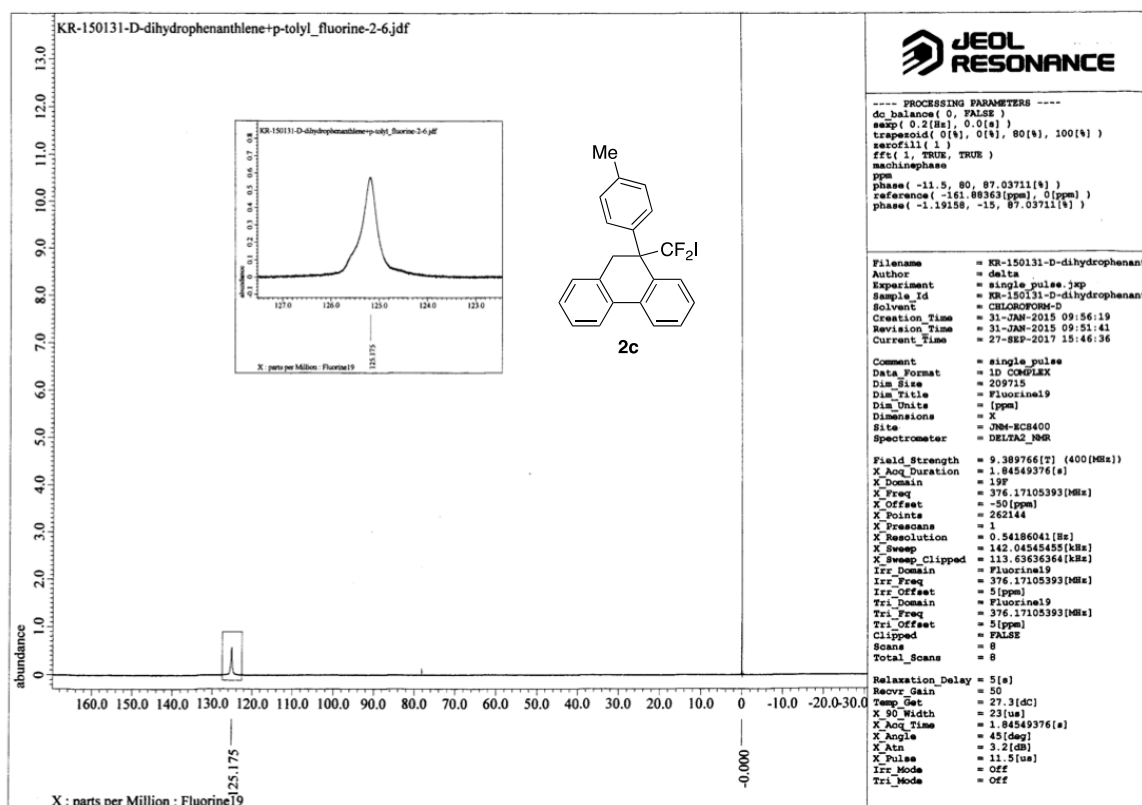

## 9-(Difluoriodomethyl)-9-(3-methylphenyl)-9,10-dihydrophenanthrene (2d)

141203-D-dihydrophenanthrene+m-Me 1H

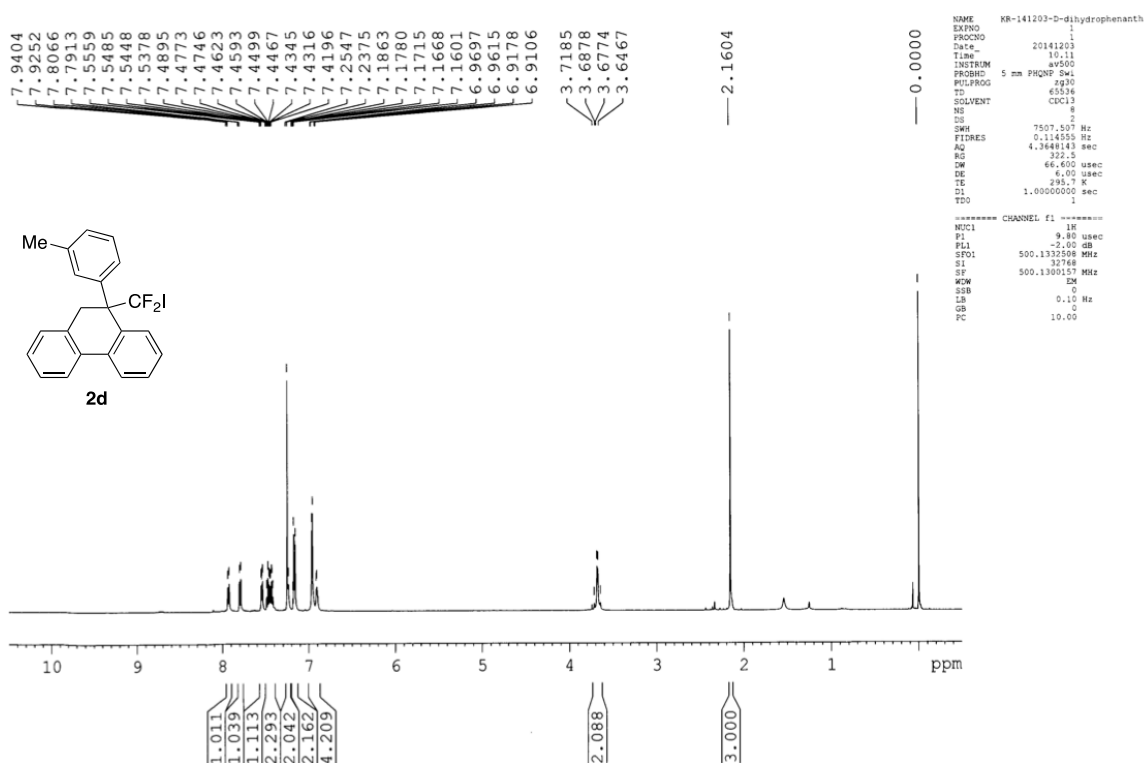

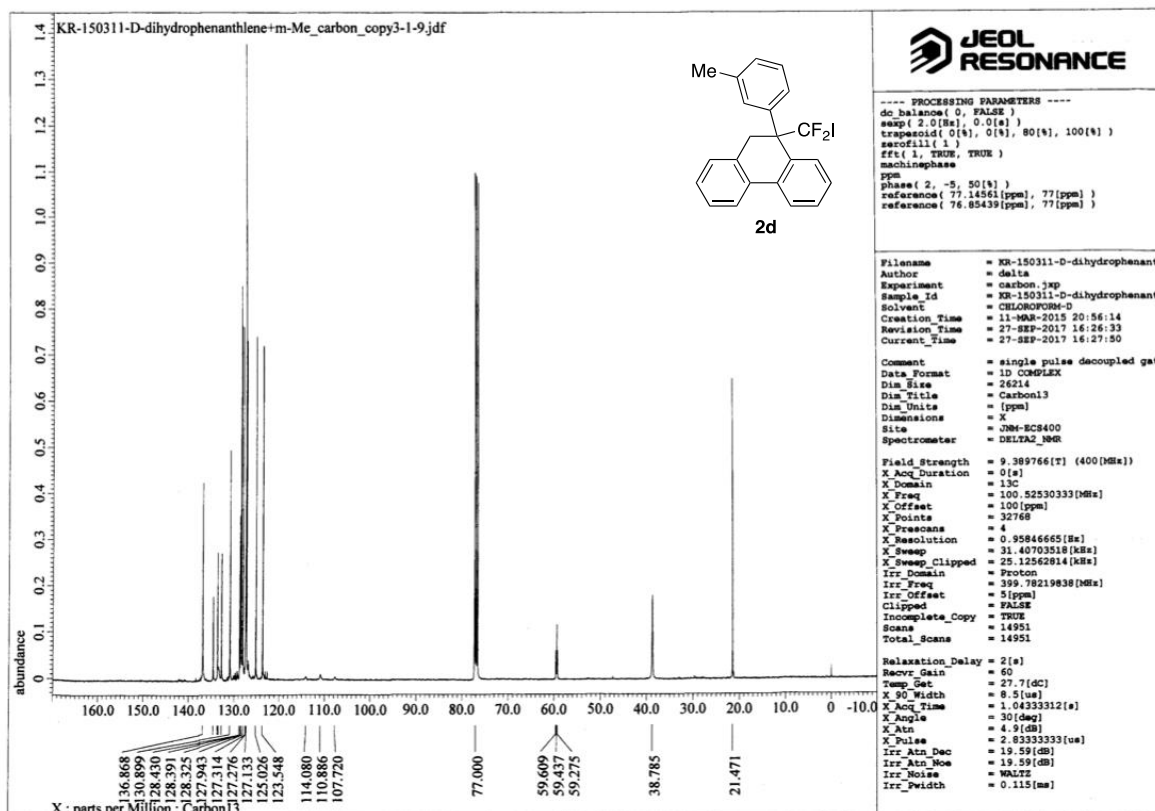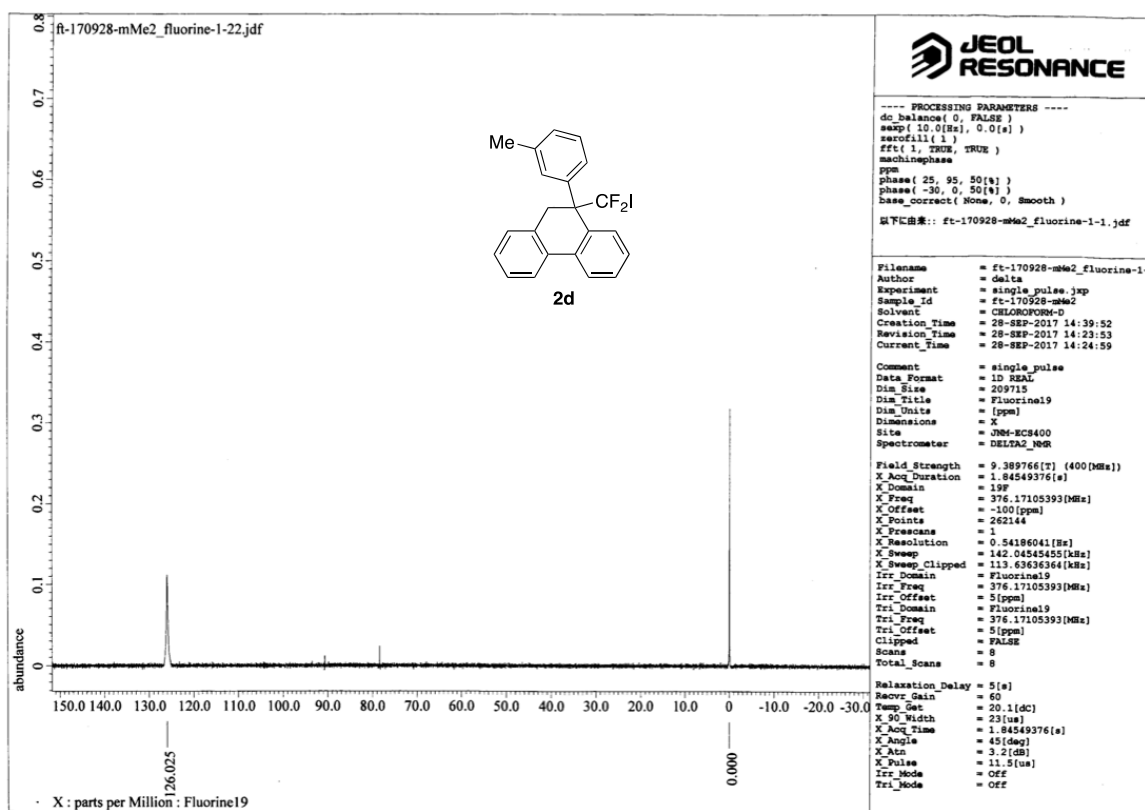

# 9-(Difluoriodomethyl)-9-(4-methoxyphenyl)-9,10-dihydrophenanthrene (2e)

141209-D-dihydrophenanthrene+p-OMe 1H

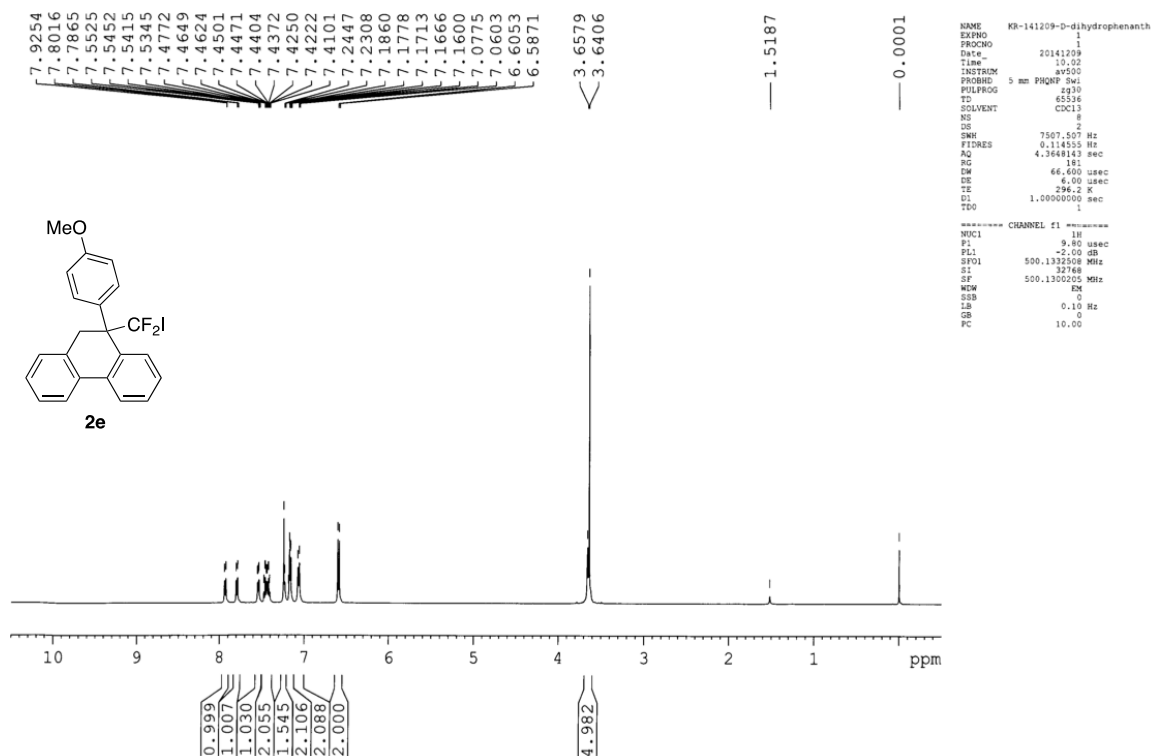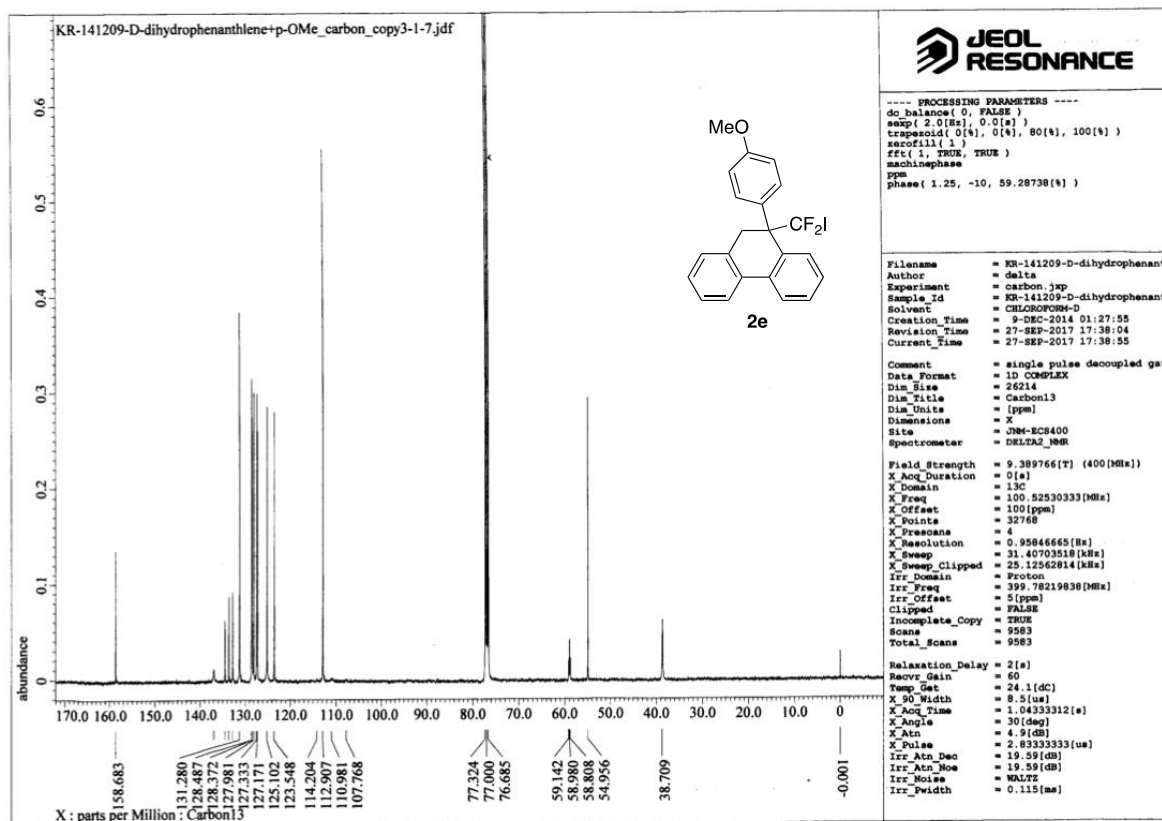



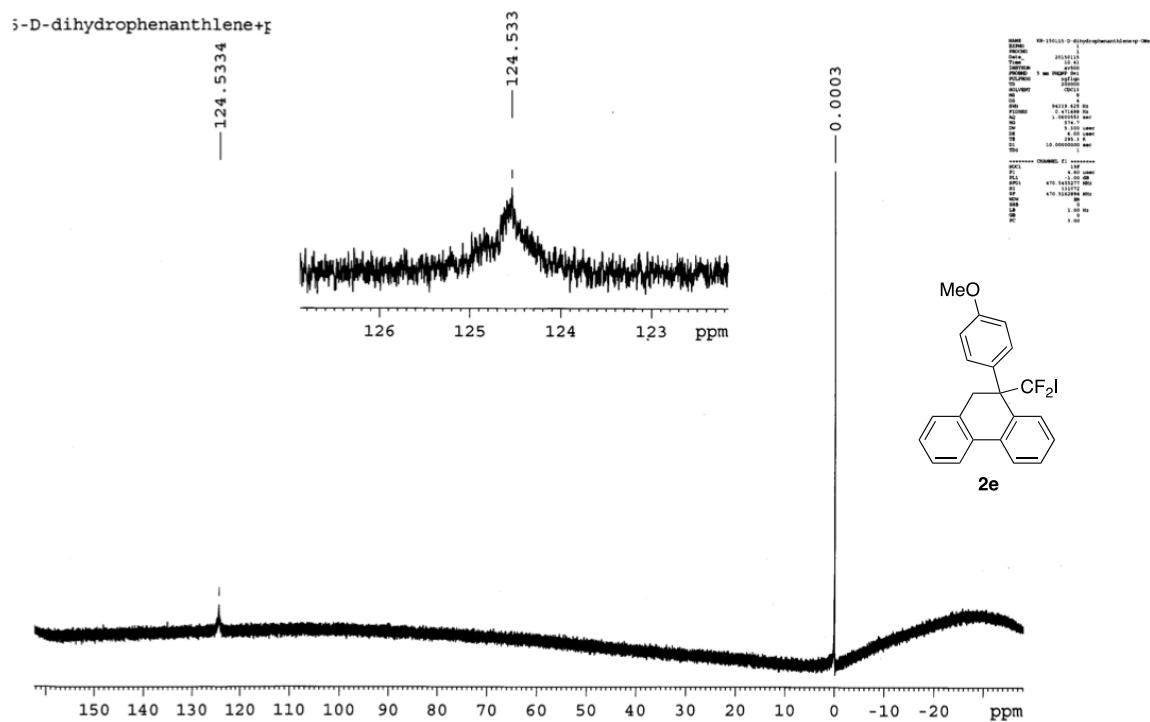

## 10-(Difluoriodomethyl)-2-methyl-10-phenyl-9,10-dihydrophenanthrene (2f)

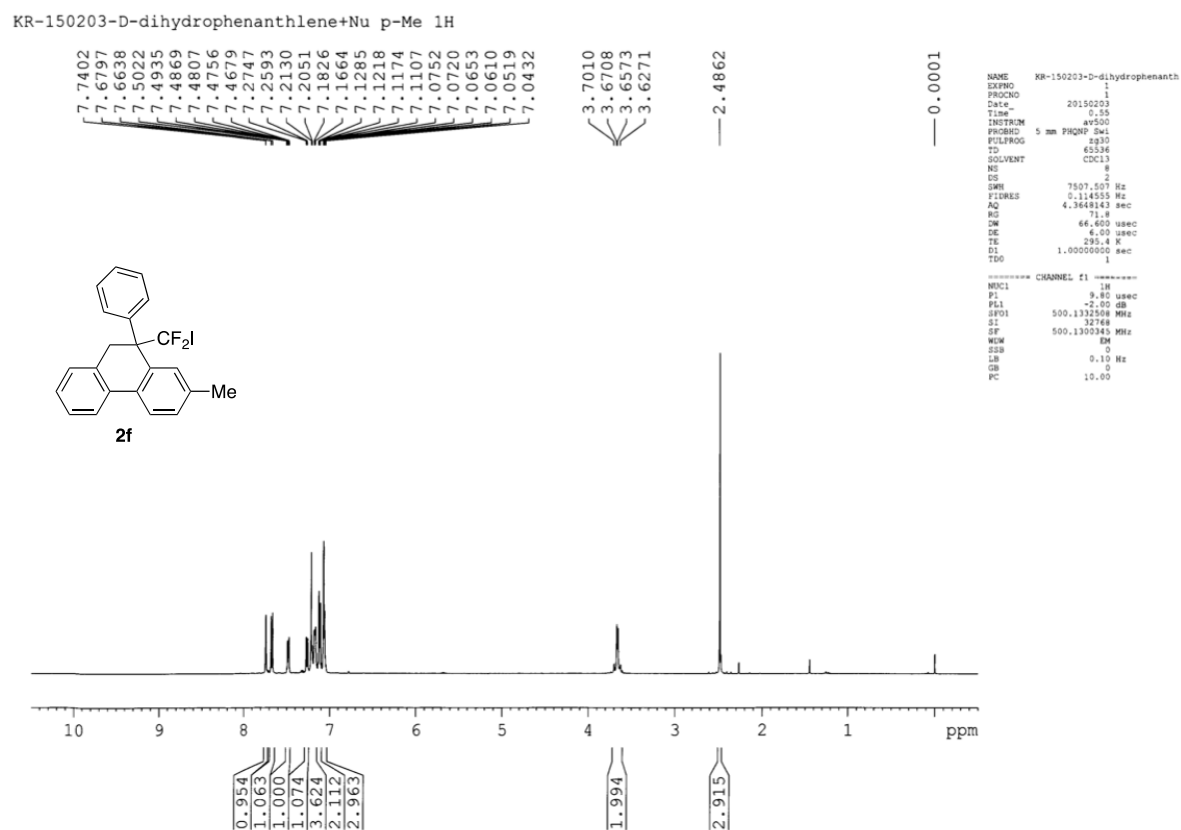

136.9414  
136.7060  
133.7272  
133.6088  
132.3872  
131.8512  
130.1315  
129.2727  
129.1304  
128.4234  
127.5447  
127.4723  
127.2799  
124.9417  
123.2323  
113.2782  
110.7718  
108.2788

— 77.0003

59.6290  
59.4984  
59.3674

— 38.8549

— 21.7014

2

c1ccc(cc1)-c2ccccc2-c3ccccc3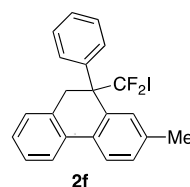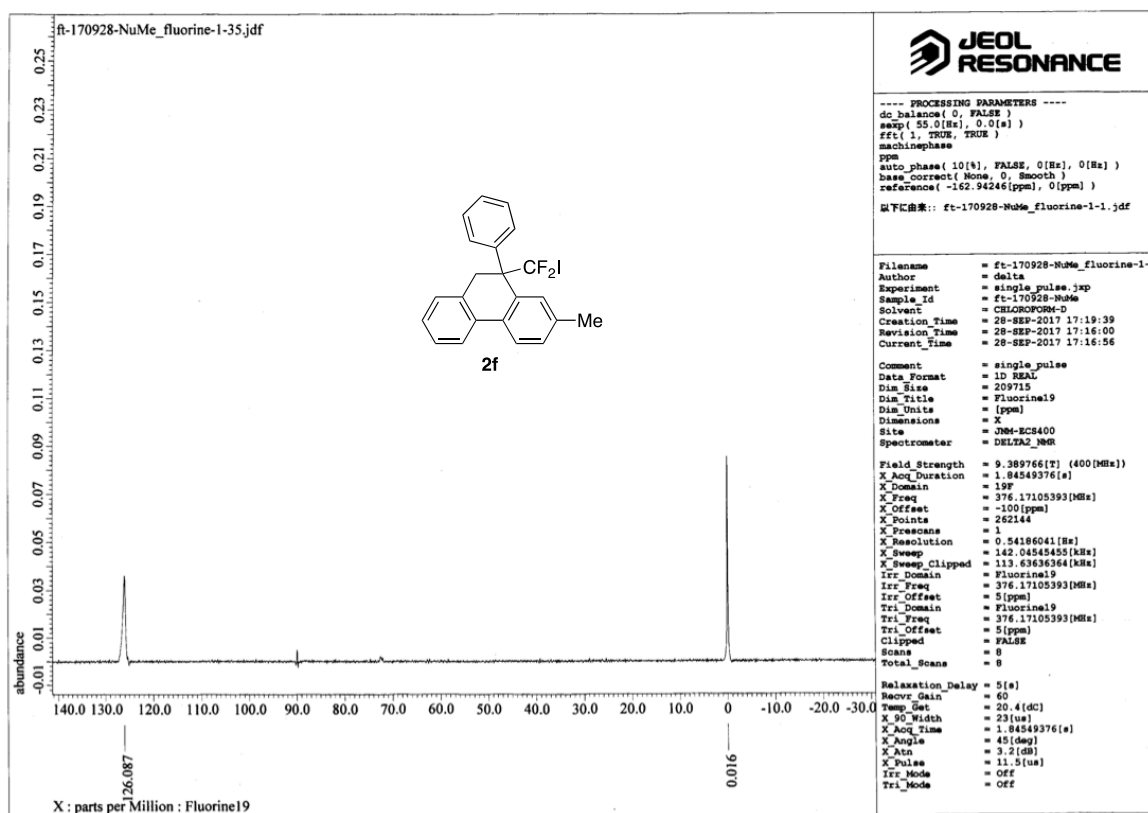

# 10-(Difluoriodomethyl)-2-methoxy-10-phenyl-9,10-dihydrophenanthrene (2g)

150108-D-dihydrophenanthrene+Nu p-OMe

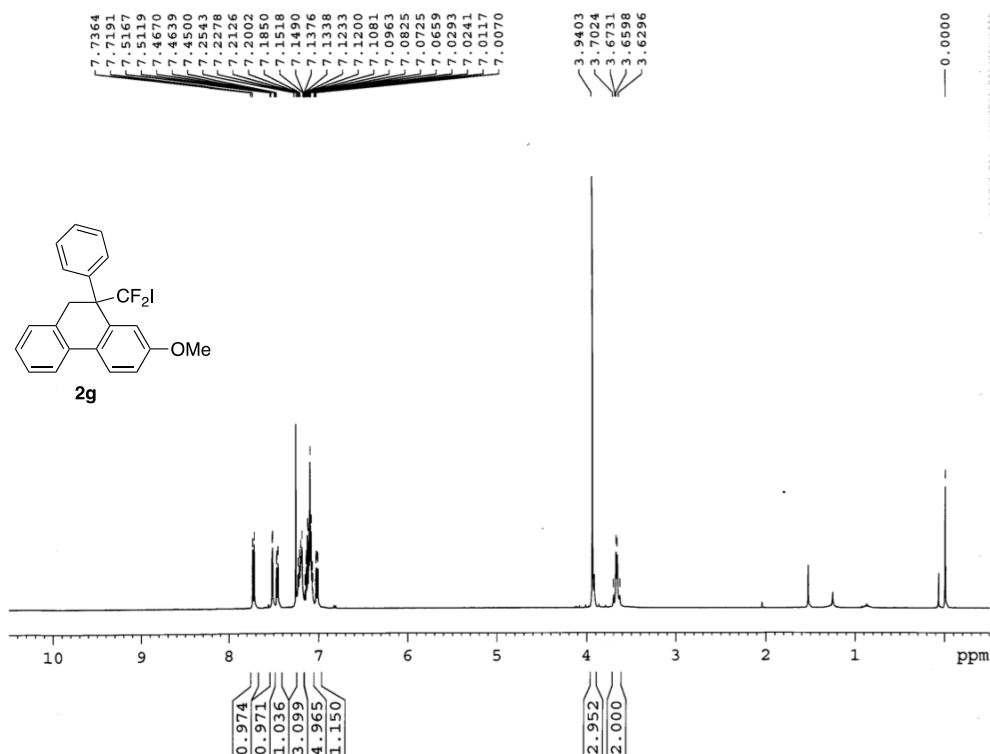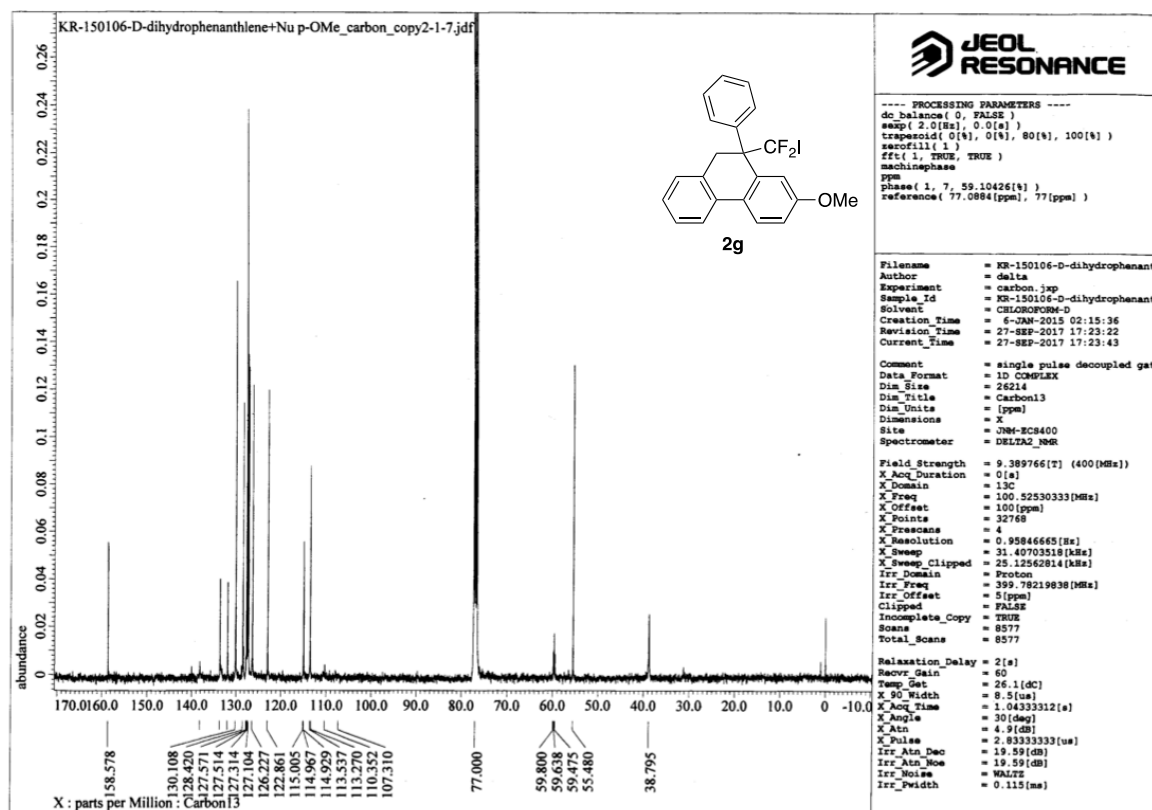

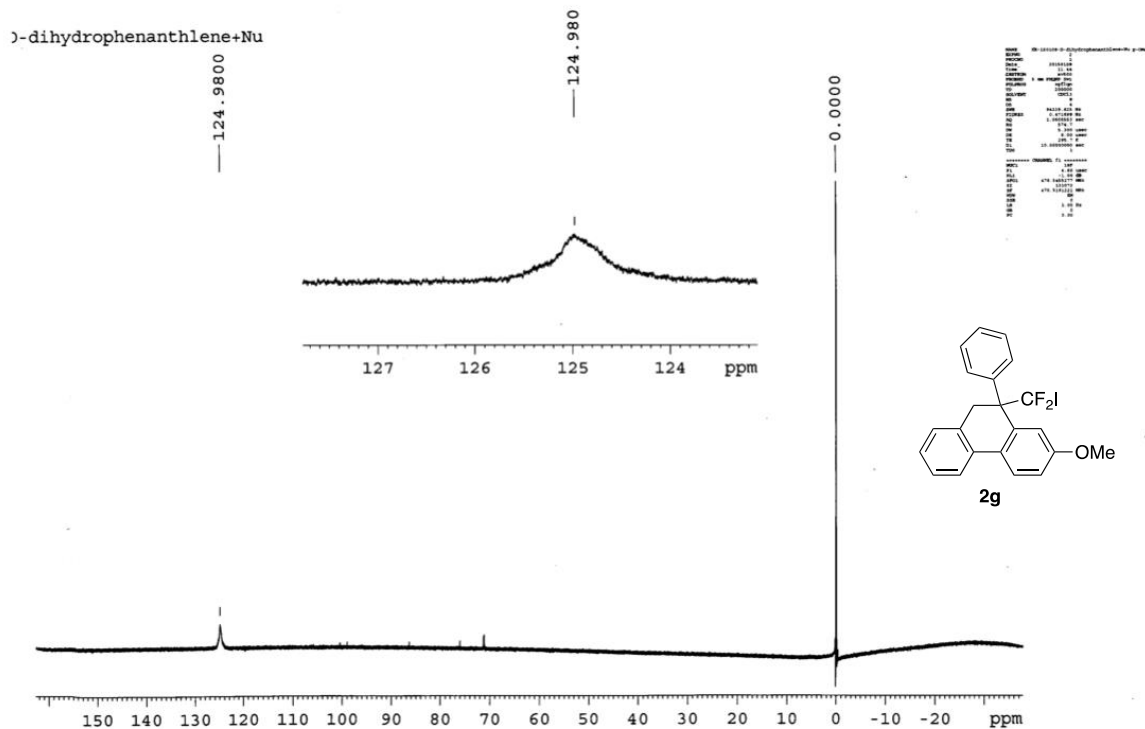

## 9-(Difluoromethyl)-9-phenyl-9,10-dihydrophenanthrene (4a)

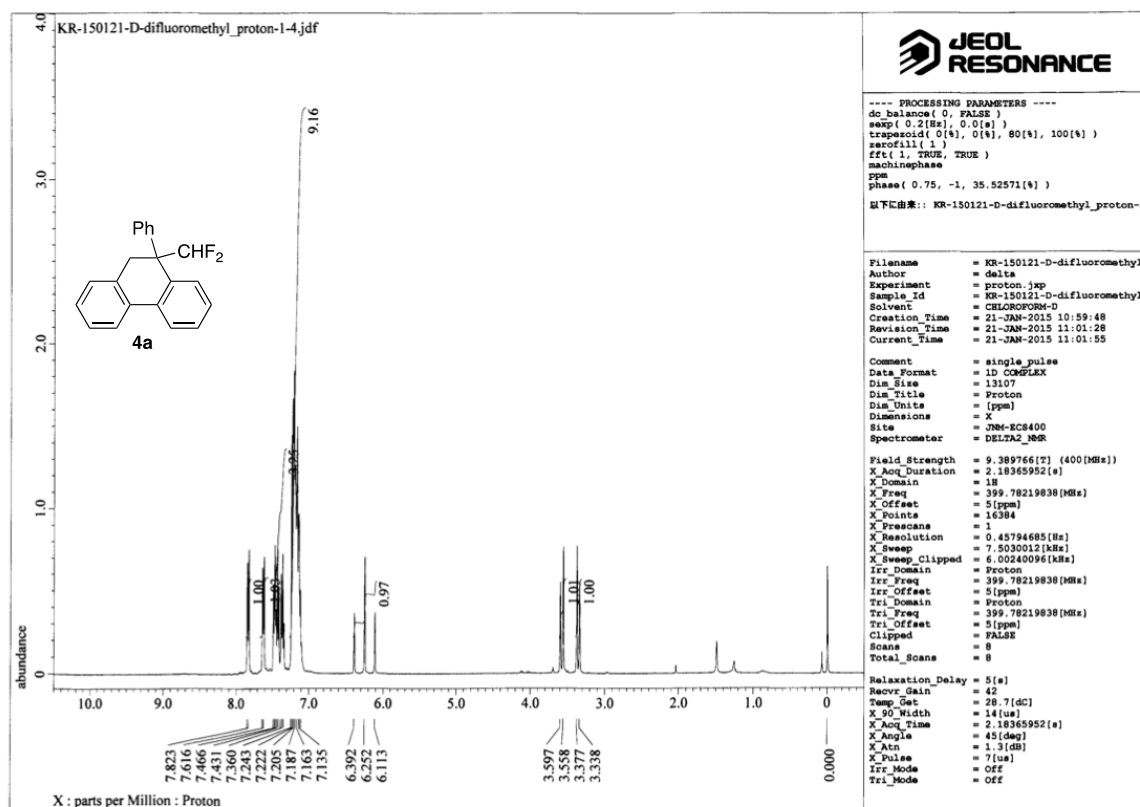

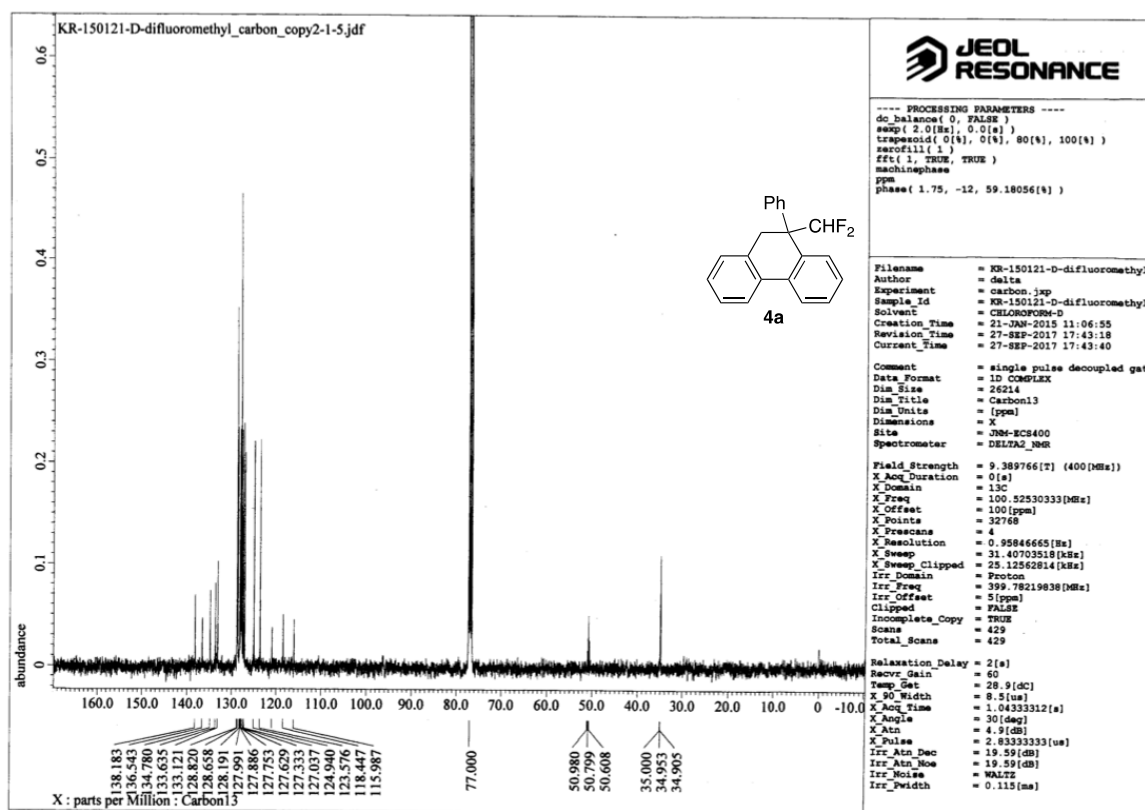

150121-D-difluoromethyl

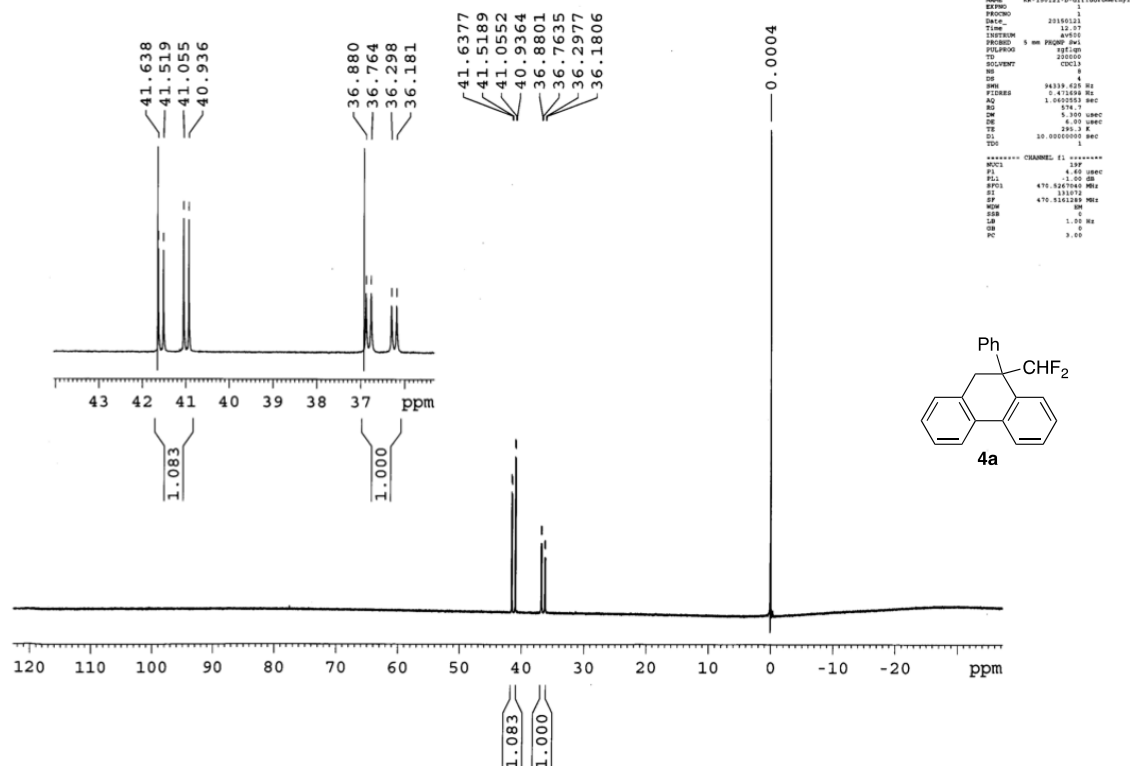

# 5,5-Difluoro-6-iodo-6,7-dihydro-5H-dibenzo[a,c][7]annulene (6a)

KR-141030-D-dibenzo7annulene 1H

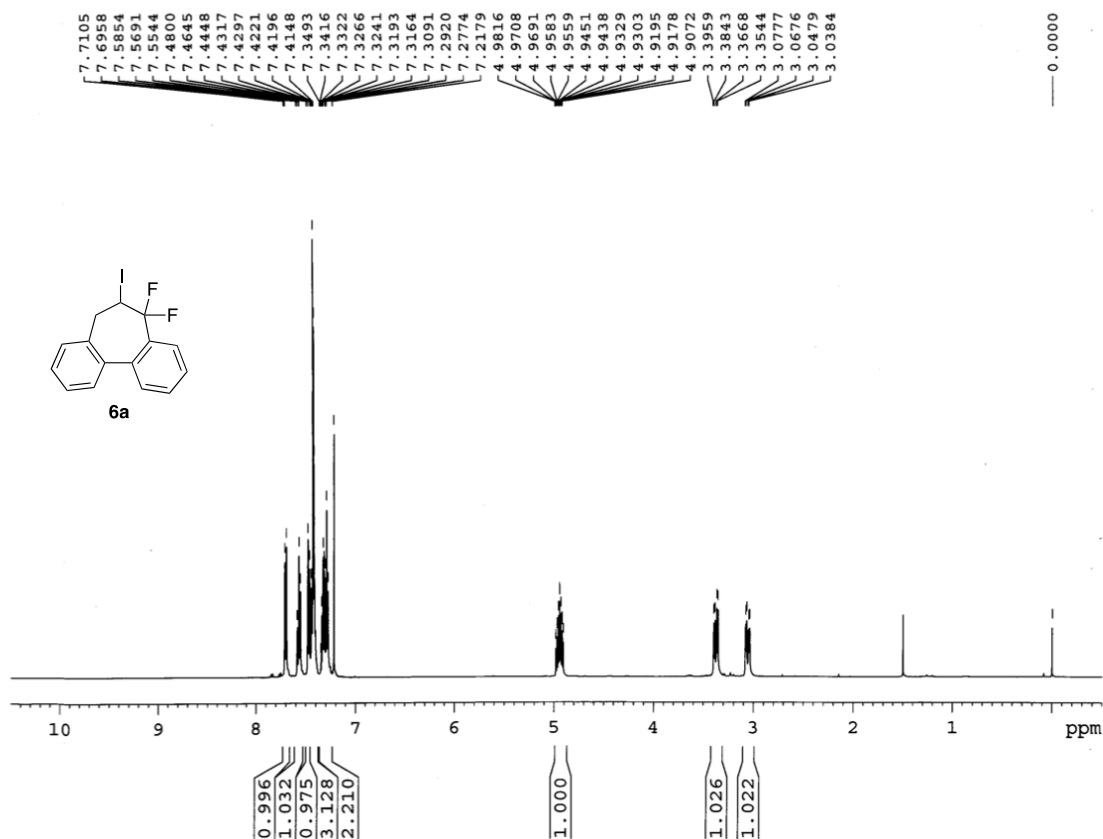

11030-D-dibenzo7annulene

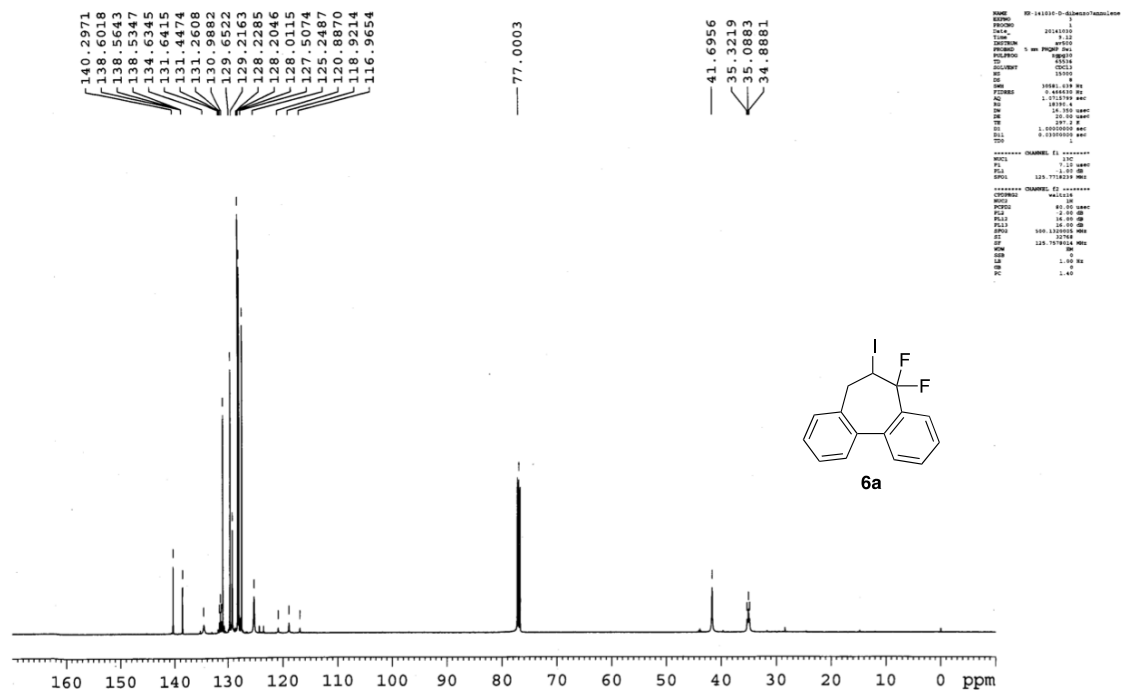

120°C, relaxation delay 55

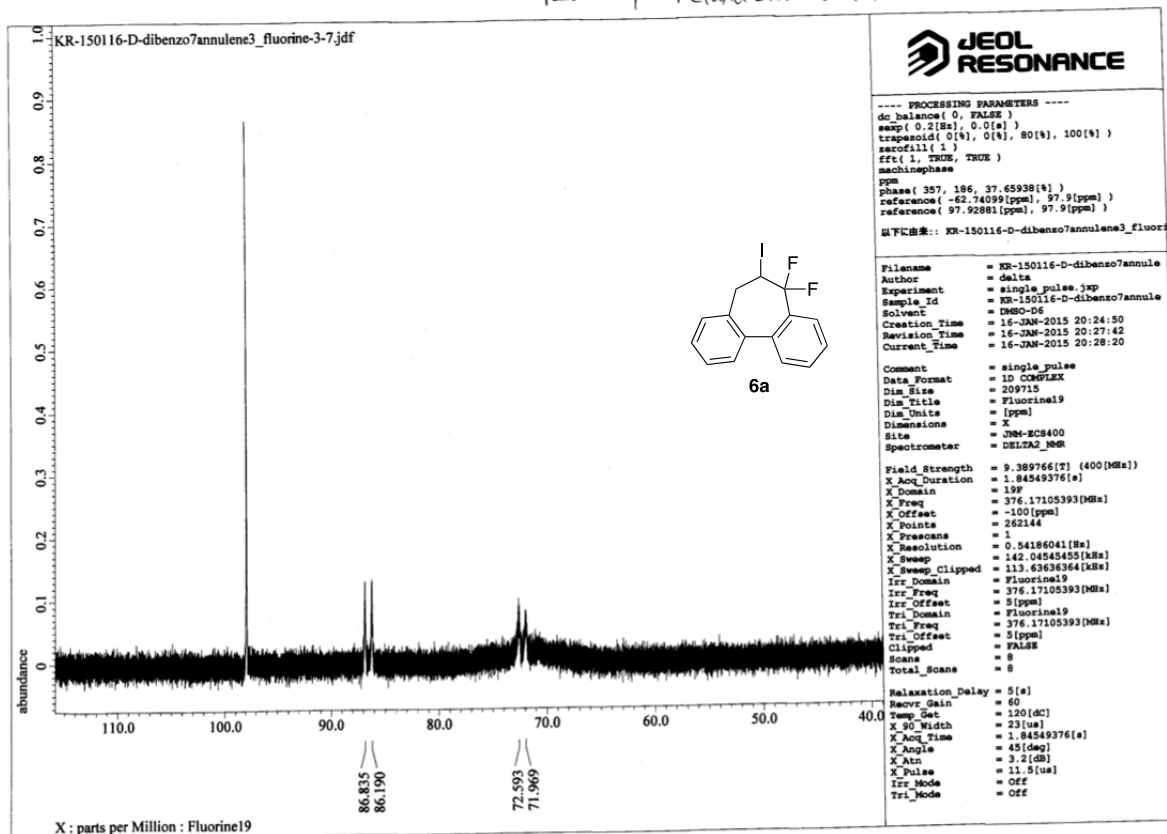

## 5,5-Difluoro-6-iodo-3-methyl-6,7-dihydro-5H-dibenzo[a,c][7]annulene (6b)

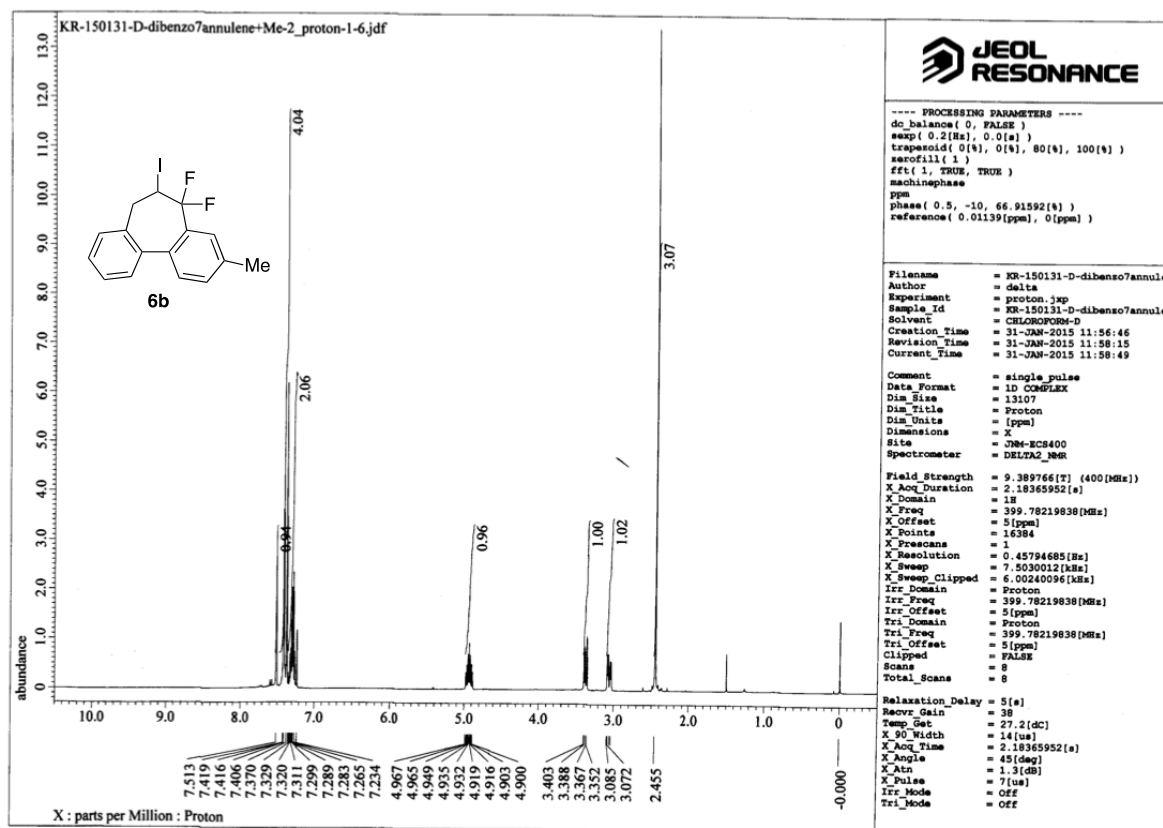

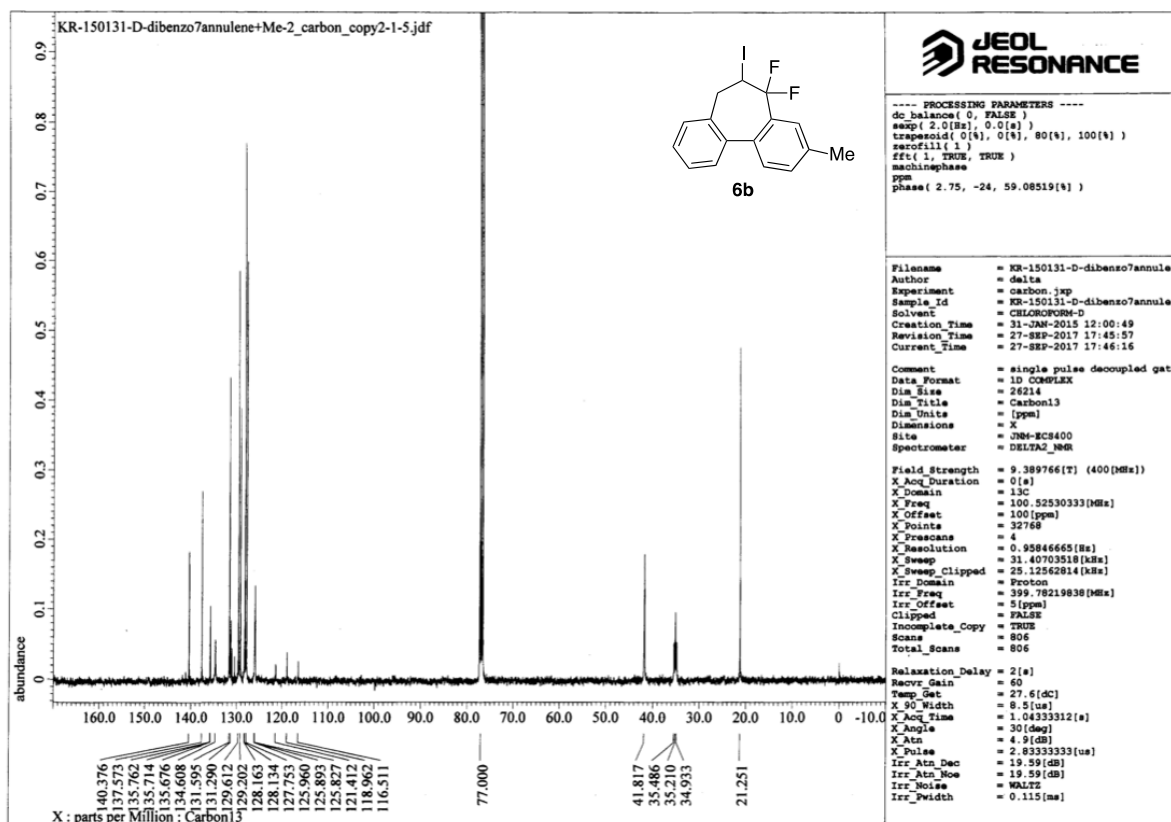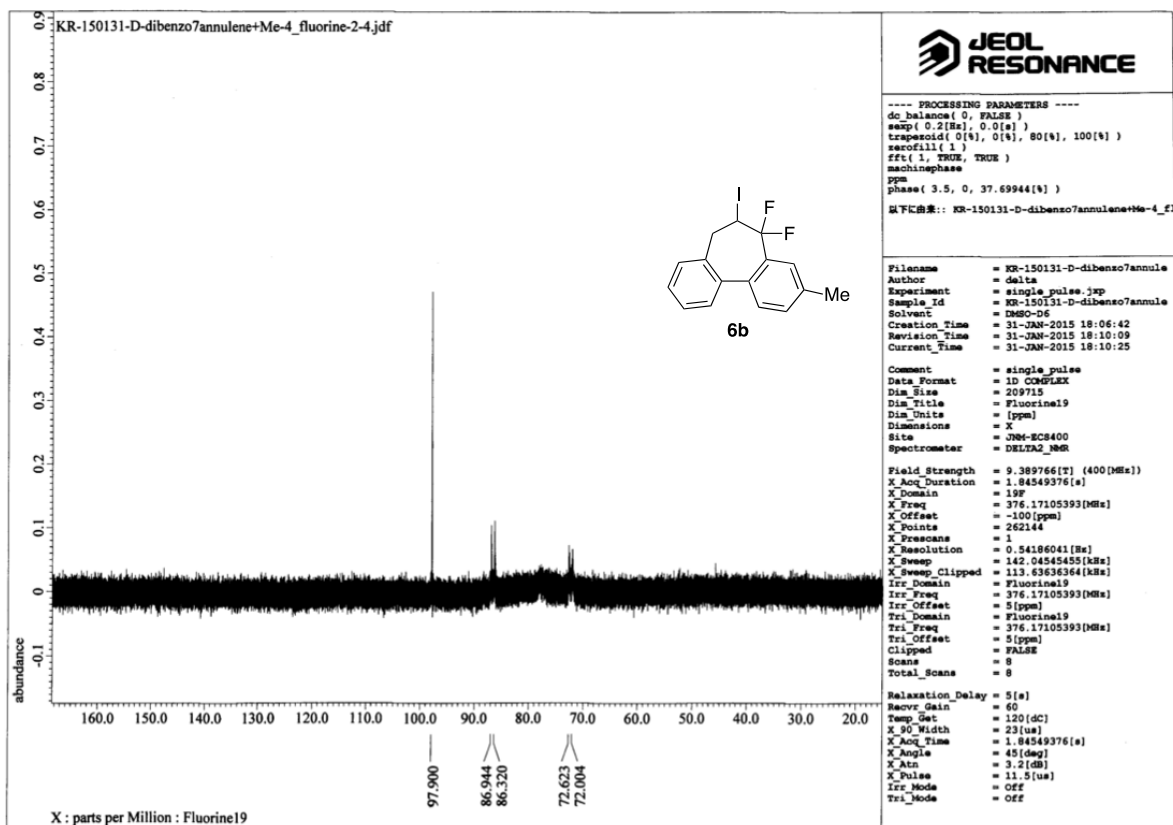



### 3-Bromo-5,5-difluoro-6-iodo-6,7-dihydro-5H-dibenzo[a,c][7]annulene (6c)

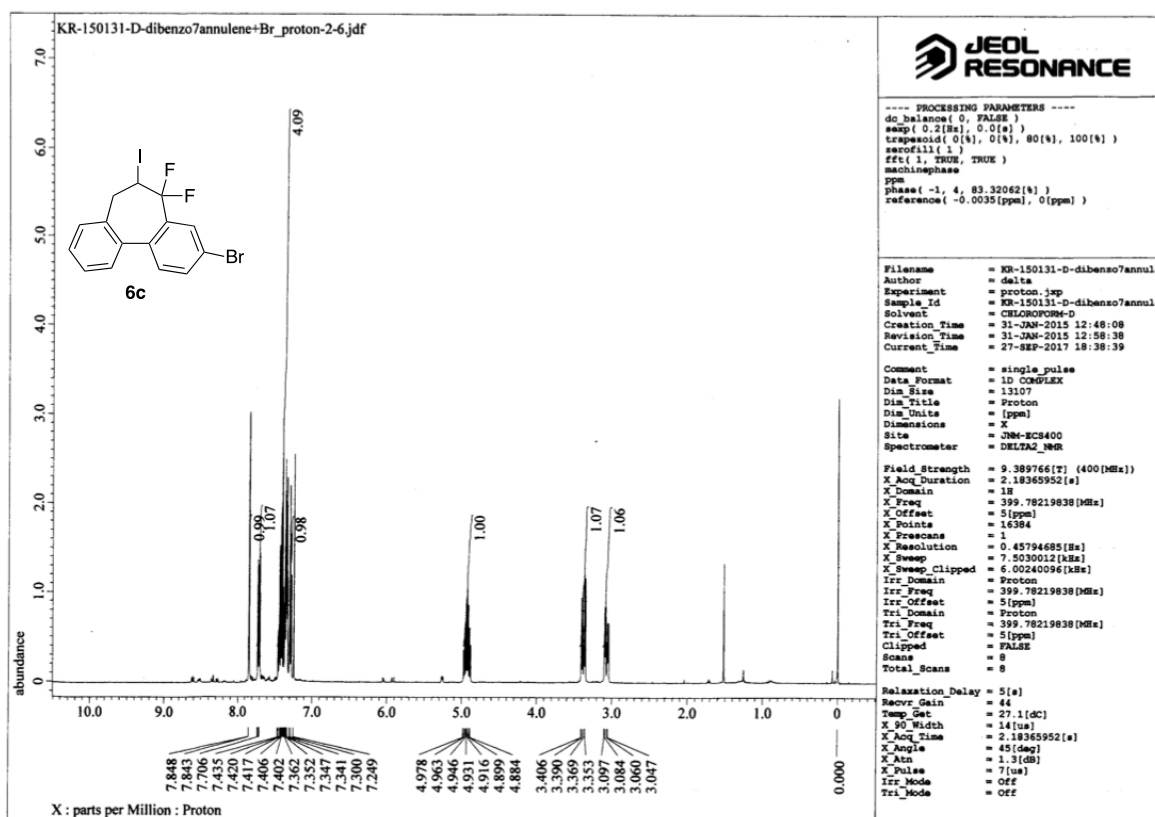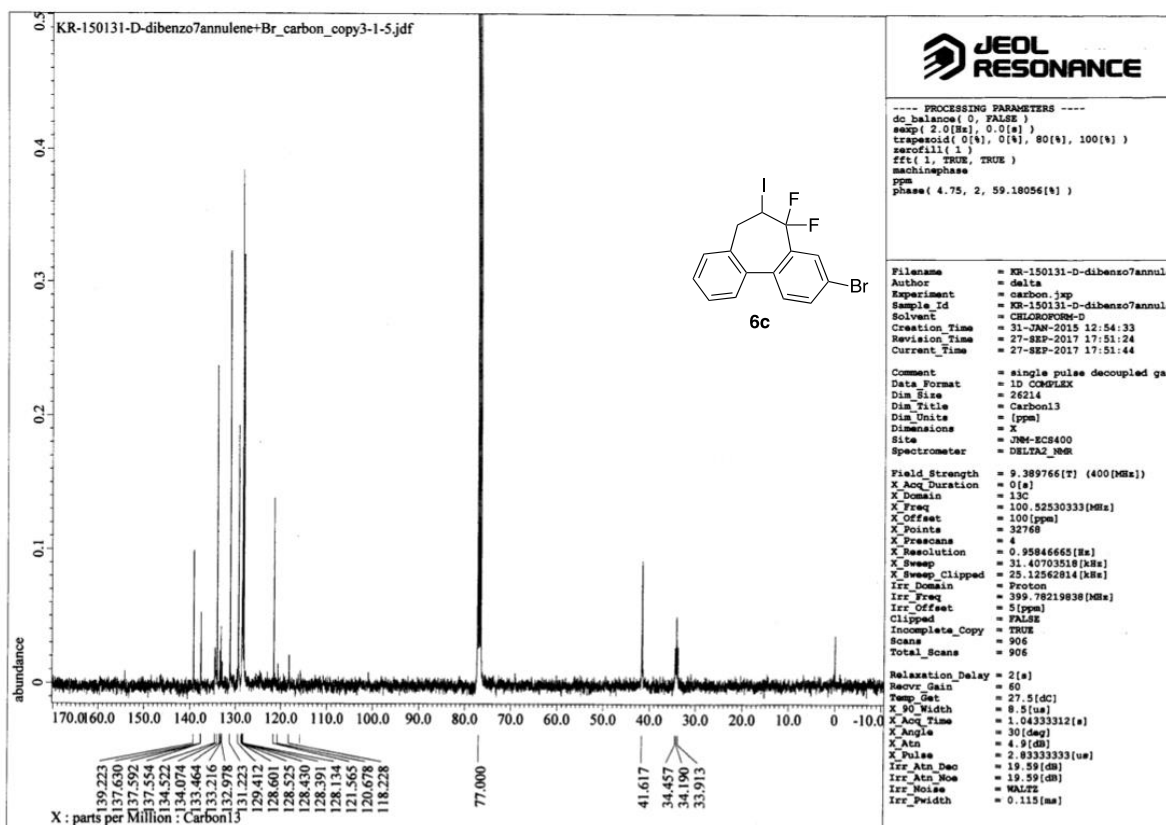

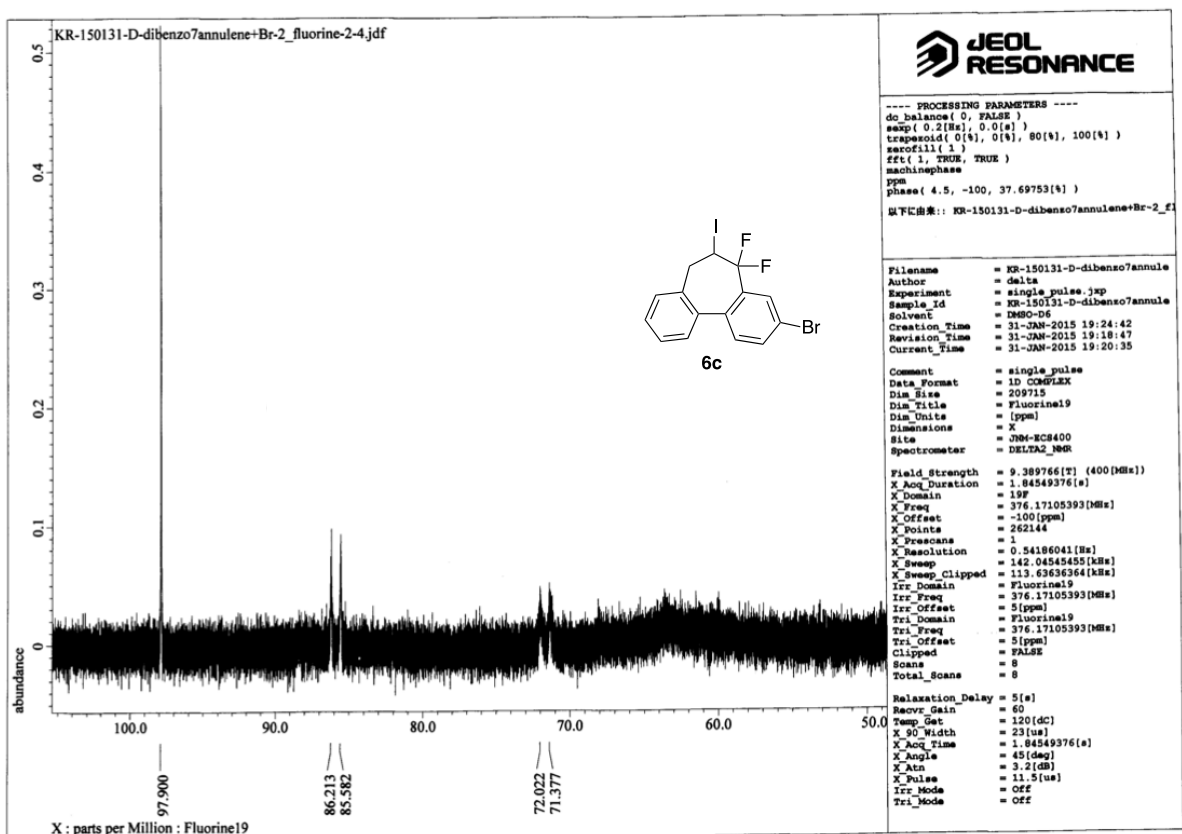

## 5,5-Difluoro-5H-dibenzo[a,c][7]annulene (7a)

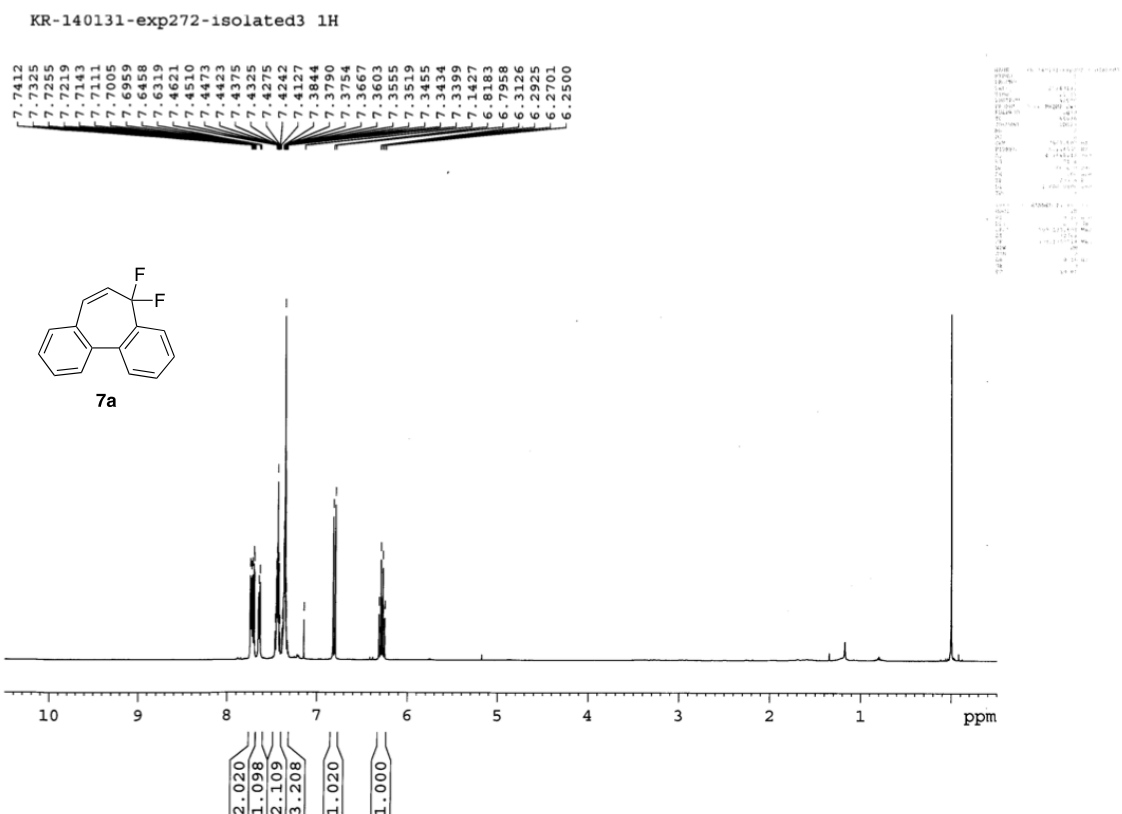

l40131-exp272-isolated3

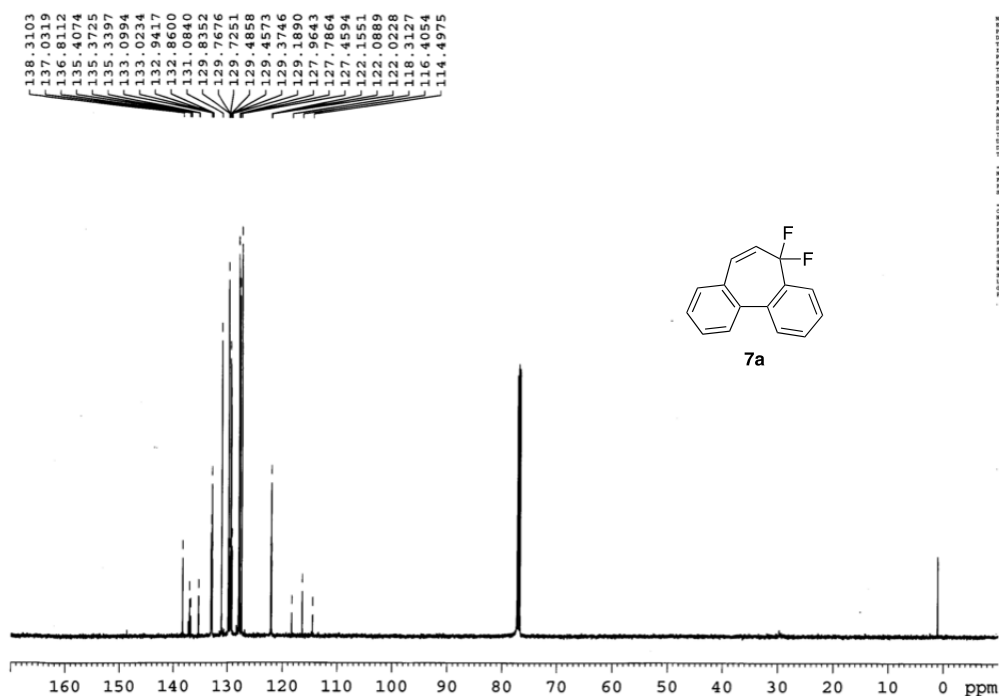

```
NAME KR-140131-exp272-isolated3
EXPNO 1
PROCNO 1
Date_ 20150112
Time 13.10
INSTRUM 1H NMR
PULPROG zgpg30
TD 65536
AQ 1.00000000
RG 327.5
SD 1
DE 1.00000000
SI 1
SOLVENT CDCl3
NS 2
DS 2
SWH 300.61000 MHz
F2 100.6261260 MHz
AQ 1.0713700 sec
RG 327.5
DE 1.00000000
SI 1
SOLVENT CDCl3
NS 2
DS 2
SWH 300.61000 MHz
F2 100.6261260 MHz
AQ 1.0713700 sec
RG 327.5
DE 1.00000000
SI 1
```

7a

120 °C

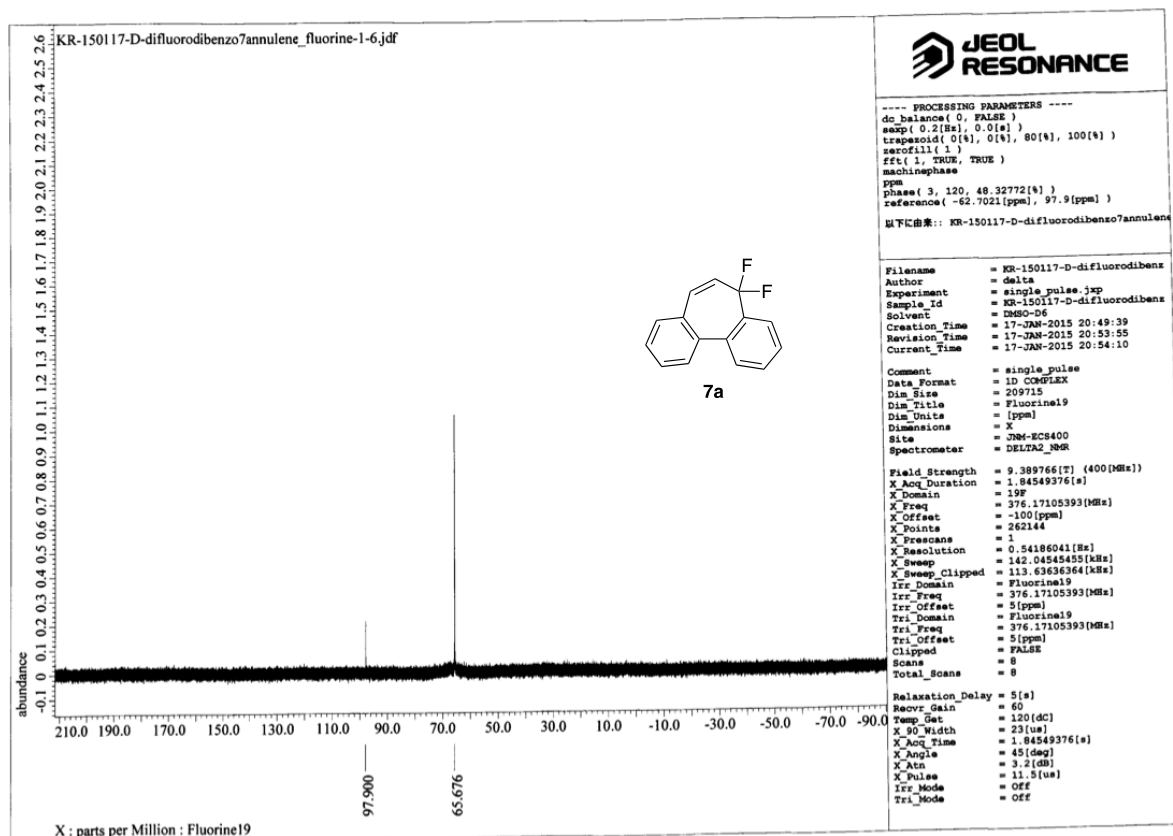

**JEOL**  
RESONANCE

----- PROCESSING PARAMETERS -----  
 dc balance( 0, FALSE )  
 amp( 0.2[Hz], 0.0[s] )  
 trapezoid( 0[Hz], 0[Hz], 80[Hz], 100[Hz] )  
 zerofill( 1 )  
 fft( 1, TRUE, TRUE )  
 machinphase  
 ppm  
 phase( 3, 120, 48.32772[Hz] )  
 reference( -62.7021[ppm], 97.9[ppm] )  
 以下に由来: KR-150117-D-difluorodibenzo7annulene

Filename = KR-150117-D-difluorodibenz  
 Author = delta  
 Experiment = single\_pulse.jpg  
 Sample Id = KR-150117-D-difluorodibenz  
 Solvent = DMSO-D6  
 Creation\_Time = 17-JAN-2015 20:49:39  
 Revision\_Time = 17-JAN-2015 20:53:55  
 Current\_Time = 17-JAN-2015 20:54:10  
 Comment = single\_pulse  
 Data\_Format = 1D COMPLEX  
 Dim Size = 209715  
 Dim Title = Fluorine19  
 Dim Units = [ppm]  
 Dimensions = X  
 Site = JNM-ECS400  
 Spectrometer = DELTA2\_NMR  
 Field\_Strength = 500.136400 MHz  
 X\_Acq\_Duration = 1.84549376[s]  
 X\_Domain = 19F  
 X\_Freq = 376.17105393 MHz  
 X\_Offset = -100[ppm]  
 X\_Points = 262144  
 X\_Frescans = 1  
 X\_Resolution = 0.54186041[Hz]  
 X\_Sweep = 142.04545455[kHz]  
 X\_Sweep\_Clipped = 113.63636364[kHz]  
 Irf\_Domain = Fluorine19  
 Irf\_Freq = 376.17105393 MHz  
 Irf\_Offset = 5[ppm]  
 Tri\_Domain = Fluorine19  
 Tri\_Freq = 376.17105393 MHz  
 Tri\_Offset = 5[ppm]  
 Clipped = FALSE  
 Scans = 8  
 Total\_Scans = 8  
 Relaxation\_Delay = 5[s]  
 Recv\_Gain = 60  
 Temp\_Set = 120[deg]  
 X\_90\_Width = 23[us]  
 X\_Acq\_Time = 1.84549376[s]  
 X\_Angle = 45[deg]  
 X\_Atn = 3.2[dB]  
 X\_Pulse = 11.5[us]  
 Irf\_Mode = Off  
 Tri\_Mode = Off
